# Supplementary material for: Storm effects on intertidal invertebrates: increased beta diversity of few individuals and species
Source: PeerJ. 2017 May 23;5:e3360. doi: 10.7717/peerj.3360 (PMC5444370; doi:10.7717/peerj.3360)
Supplement: Data S1 [file peerj-05-3360-s001.xlsx]

## Sheet: names
storm
month
site	sampling site
sal	salinity
temp	temperature (oC)
mo	organic matter (%)
caco3	calcium carbonate (%)
dm	mean diameter (phi)
sel	sorting coeficient
peeb	peebles (%)
amg	very coarse sand (%)
ag	coarse sand (%)
am	medium sand (%)
af	fine sand (%)
amf	very fine sand (%)
as	mud (%)
deep	depth (m)
Pw3	Power of waves for the 3 days before sampling
Pw7	Power of waves for the 7 days before sampling
Pw14	Power of waves for the 14 days before sampling
biomass	biomass (g AFDW/m2)
richness	number of species (per site = 0.0942 m2)
abund	abundance (per site = 0.0942 m2)
s.mol	number of species of moluscs (per site = 0.0942 m2)
s.pol	number of species of polychaetes (per site = 0.0942 m2)
s.crust	number of species of crustaceans (per site = 0.0942 m2)
n.mol	number of individuals of moluscs (ind.m2)
n.pol	number of individuals of polychaetes (ind.m2)
n.crust	number of individuals of crustacean (ind.m2)
b.mol	biomass of moluscs (g AFDW/m2)
b.pol	biomass of polychaetes (g AFDW/m2)
b.crust	biomass of crustaceans (g AFDW/m2)

## Sheet: uni
storm	month	site	sal	temp	mo	caco3	dm	sel	peeb	amg	ag	am	af	amf	as	richness	abund	biomass	rich.mol	rich.pol	rich.crust	abund.mol	abund.pol	abund.crust	biom.mol	biom.pol	biom.crust
no	1.sep	S1	34	20	1.21	4.36	3.367	0.3978	0.0521627	0.0963005	0.421315	1.96413	8.72924	86.7406	1.99623	13	92	4.33322	3	9	1	14	77	1	3.25408	1.07914	0
no	1.sep	S2	33	20	2.88	9.39	2.34	1.577	12.2688	3.51453	2.48179	3.57858	9.84109	65.7473	2.56785	23	237	4.22899	7	13	3	28	59	150	3.2509	0.536481	0.441608
no	1.sep	S3	32	20	0.63	6.53	1.053	1.644	21.7385	18.1552	17.0363	7.5777	4.90074	30.008	0.583517	11	21	0.824965	1	10	0	2	19	0	0.0778485	0.747117	0
no	1.sep	S4	34	20	0.87	10.93	2.789	1.168	7.9469	2.49079	2.97133	4.48703	18.8251	61.1985	2.08033	23	301	9.22594	6	12	3	25	65	209	8.19867	0.412604	0.614671
no	1.sep	S5	33	20	1.24	2.82	2.471	1.186	1.53801	1.88834	18.14	3.74592	14.9461	57.5764	2.16518	23	144	6.22597	6	14	3	53	70	21	5.46997	0.702289	0.0537091
no	1.sep	S6	30	21	1.14	5.57	2.555	1.224	4.30023	3.1206	5.87306	11.2026	27.2296	46.3946	1.8793	12	48	2.47265	3	8	1	11	33	4	1.719	0.741713	0.0119354
no	1.sep	S7	32	21	1.46	2.31	2.804	1.009	2.65753	1.63139	4.92224	9.63404	15.5063	63.9089	1.73962	10	55	3.59532	3	6	1	25	28	2	2.89342	0.695928	0.00596768
no	1.sep	S8	32	21	1.34	6.22	2.023	1.49	11.4152	4.07303	7.57579	15.8684	16.4644	42.9321	1.67119	8	112	6.81363	1	6	1	1	96	15	0.748078	6.0208	0.0447576
no	1.sep	S9	32	21	1.75	2.96	2.726	1.115	0.383126	2.27669	8.34253	16.2036	18.5164	50.5627	3.71492	12	106	3.98456	4	4	4	10	9	87	2.45175	1.07409	0.458711
no	1.sep	S10	34	21	1.5	2.36	3.25	0.5142	0.228178	0.260203	2.66808	3.28456	11.0346	78.7534	3.77094	20	97	1.92352	4	14	2	20	73	4	1.1389	0.775666	0.00895152
no	1.sep	S11	33	21	1.33	9.17	2.858	0.9552	1.97984	2.16583	4.54764	7.41741	29.5136	51.2959	3.07975	19	598	8.9371	6	12	1	14	53	531	6.66837	0.684312	1.58442
no	1.sep	S12	33	22	1.47	3.68	1.865	1.621	9.58492	8.84961	11.3485	12.1894	18.6477	36.1377	3.24213	8	27	8.39503	2	5	1	11	13	3	7.48078	0.905294	0.00895152
no	1.sep	S13	32	21	1.57	5.94	2.369	1.337	10.7082	3.00006	4.11008	6.77814	17.1143	57.3571	0.932019	11	183	13.0159	4	6	1	19	95	69	11.276	1.53397	0.205885
no	1.sep	S14	33	21	1.52	6.26	3.101	0.8785	1.40342	1.23075	1.83308	8.30205	17.4413	62.0515	7.73787	6	127	6.24319	2	3	1	9	16	102	5.31439	0.62444	0.304352
no	1.sep	S15	33	22	0.75	7.9	2.042	1.796	13.049	10.7016	8.33433	5.61661	8.44184	47.0374	6.81918	5	157	11.4279	2	3	0	4	153	0	0.864851	10.5631	0
no	1.sep	S16	34	22	2.21	2.94	2.978	0.6915	0.0178091	0.823176	4.57891	5.24577	31.2253	56.8882	1.22091	18	370	2.66693	6	10	1	24	46	299	1.19593	0.578838	0.892168
no	1.sep	S17	33	22	0.96	3.87	1.832	1.576	5.86238	14.6272	13.6921	8.35583	17.2239	39.8495	0.389105	18	1006	5.81584	6	11	1	15	19	972	2.49646	0.419087	2.90029
no	1.sep	S18	27	22	1.62	2.97	3.319	0.567	0.001	0.001	0.544763	4.64651	13.2666	74.2359	7.30623	5	43	1.28321	0	3	2	0	41	2	0	1.28321	0
no	1.sep	S19	33	22	1.05	3.43	3.356	0.4385	0.001	0.160176	0.6367	1.88407	13.0784	80.2283	4.01241	9	68	0.591293	1	7	1	7	27	34	0.160929	0.328913	0.101451
no	1.sep	S20	34	22	3.46	6.47	2.388	1.688	8.81897	6.24208	6.67659	5.36702	12.977	47.3054	12.6129	26	143	36.5726	9	15	2	70	70	3	35.6832	0.883409	0.00596768
no	1.sep	S21	34	22	0.8	8.09	1.484	1.679	14.4782	7.02053	13.6721	19.2368	17.9534	24.3924	3.24657	21	583	25.7598	7	10	2	41	44	495	22.8975	1.38831	1.47402
no	1.sep	S22	33	22	1.82	5.87	3.021	1.197	5.99174	2.18848	3.16136	4.27866	16.4587	60.7237	7.1973	19	759	4.78611	2	13	3	3	83	672	0.137275	2.44159	2.20724
no	1.sep	S23	34	22	1.72	7.28	2.883	1.363	5.64341	3.29333	4.55366	6.28964	16.9322	53.8071	9.48061	12	144	5.43488	2	9	1	6	44	94	3.77931	1.37508	0.280481
no	1.sep	S24	32	22	2.75	4.31	3.216	0.8063	0.0819443	0.099932	2.71615	7.01923	16.4808	61.5282	12.0738	13	505	4.98831	4	8	1	7	23	475	2.85825	0.712735	1.41732
no	1.sep	S25	32	22	1.6	3.67	3.244	0.9668	0.441519	2.42033	3.48599	5.38854	11.6962	62.9004	13.667	12	1780	18.4482	4	7	1	6	266	1508	0.787002	13.1616	4.49963
no	1.sep	S26	32	22	1.33	1.59	2.035	1.697	8.89894	10.7701	7.21716	13.4587	11.1042	43.0713	5.4797	11	69	1.59135	1	8	1	3	51	14	0.0689695	1.4806	0.0417738
no	1.sep	S27	34	25	3.65	8.11	2.265	1.728	4.5372	11.5489	9.36705	9.46999	13.9971	42.0579	9.02192	15	106	2.59772	1	12	1	2	99	4	0.0459796	2.5398	0.0119354
no	1.sep	S28	33	23	1.3	2.64	2.193	1.16	2.16307	2.96719	5.64088	38.9977	11.8527	35.9943	2.38421	16	92	3.32645	4	10	1	5	83	2	1.09262	2.22786	0.00596768
no	1.sep	S29	33	23	0.95	4.41	2.219	0.8064	2.64291	1.42357	2.89719	26.4171	56.2178	9.49044	0.911002	14	186	4.28013	4	9	1	12	133	41	2.50782	1.64996	0.122337
no	1.sep	S30	32	23	2.06	1	2.677	0.6193	0.152088	0.164095	0.642373	8.19075	59.8927	29.369	1.58892	15	49	0.839855	5	8	1	9	31	8	0.45244	0.363544	0.0238707
no	1.sep	S31	33	23	2.02	1.86	2.866	0.5833	0.001	0.0560976	0.186324	4.26542	55.6448	38.0041	1.84321	15	126	1.44304	2	11	1	8	116	1	0.114949	1.32809	0
no	1.sep	S32	30	24	2.87	5.73	0.1897	0.9571	44.3082	23.1276	11.0515	8.29815	9.70885	2.85743	0.648324	19	70	2.87219	6	12	1	6	62	2	2.0546	0.811618	0.00596768
no	1.sep	S33	28	24	1.89	3.36	2.321	0.8061	0.106496	0.608837	3.15068	32.7587	44.7104	15.9242	2.74077	15	628	2.2517	3	10	2	4	112	512	0.0778485	0.441044	1.73281
no	1.sep	S34	26	26	0.69	1.78	1.741	1.3	6.76617	5.70182	10.9995	29.6355	32.6084	11.9878	2.30074	11	510	2.16329	1	8	2	1	240	269	0.748078	0.407476	1.00774
no	2.feb	F1	33	29.5	1.2389	3.14	3.435	0.9342	0.801561	0.258705	0.587387	1.99542	7.13347	81.1379	8.08558	10	162	0.523093	2	7	1	2	15	145	0	0.0904358	0.432657
no	2.feb	F2	32	29	1.32748	4.33	1.978	1.696	13.0374	8.47028	3.45987	1.36704	5.40011	67.0839	1.18147	12	600	2.93014	1	10	1	1	48	551	0.748078	0.537967	1.6441
no	2.feb	F3	30	27.5	0.719268	8.24	1.18	1.681	19.7509	14.176	17.441	10.339	5.77709	31.7159	0.800103	13	119	2.24889	2	10	1	3	115	1	1.53508	0.710824	0.00298384
no	2.feb	F4	32	29.5	1.07252	2.1	3.165	0.5445	0.426149	0.421542	1.10338	3.35852	20.3515	72.4132	1.92573	17	456	2.26278	4	12	1	4	69	383	0.89421	0.225757	1.14281
no	2.feb	F5	34	28	1.35496	2.58	3.232	0.4868	0	0.12499	0.708958	2.60225	17.2855	76.9896	2.28875	17	747	4.94499	4	11	2	11	47	689	2.29215	0.391883	2.26095
no	2.feb	F6	34	27.5	1.27953	8.56	3.147	0.8014	0.576699	0.753664	3.48518	6.72677	15.9394	68.2337	4.28464	10	134	3.32939	2	7	1	4	24	106	2.28316	0.729947	0.316287
no	2.feb	F7	32	26	0.872999	3.78	3.329	0.4475	0.2897	0.854718	1.64369	2.1368	7.27743	86.4129	1.38481	5	34	0.609406	0	4	1	0	11	23	0	0.540777	0.0686283
no	2.feb	F8	32	26	0.870951	5.85	1.879	1.644	8.31797	13.3626	10.5744	10.1634	10.6591	45.7298	1.19282	6	14	0.62792	1	4	1	2	8	4	0.0778485	0.538136	0.0119354
no	2.feb	F9	32	26	1.26817	3.01	2.572	1.254	0.814181	3.11656	11.751	16.1228	18.2974	46.5629	3.33505	13	573	7.30588	2	10	1	7	61	505	4.57976	1.21928	1.50684
no	2.feb	F10	32	27	1.43164	2.21	3.434	0.3843	0	0	0.276781	1.16248	6.245	88.1251	4.19067	16	620	2.9233	5	10	1	8	21	591	0.907439	0.252408	1.76345
no	2.feb	F11	34	26	0.739296	2.61	2.825	0.8627	0.192254	1.17702	4.25096	12.0009	27.6782	52.7311	1.96954	13	162	4.5554	2	10	1	6	39	117	3.83168	0.374604	0.349109
no	2.feb	F12	33	26	1.15469	3.87	3.098	0.5831	0.177356	0.362961	1.18375	4.01114	27.6882	63.1677	3.40895	9	329	19.0791	2	6	1	25	20	284	17.9928	0.23894	0.847411
no	2.feb	F13	32	26	1.76138	4.62	2.93	0.8274	0.288951	0.935949	3.10727	9.53956	31.9458	50.5475	3.63492	9	568	10.4761	2	6	1	11	31	526	7.48078	1.42578	1.5695
no	2.feb	F14	32	26	1.81837	2.66	3.019	1.099	5.44366	3.31316	3.9508	2.28991	8.98947	73.2276	2.78538	9	279	2.73162	2	6	1	4	27	248	1.574	0.417618	0.739992
no	2.feb	F15	33	26	1.32566	2.69	2.462	2.016	2.1386	11.0674	7.86056	2.23802	3.77374	65.3488	7.57287	4	130	2.17175	1	3	0	1	129	0	0.0229898	2.14876	0
no	2.feb	F16	33	27	1.51938	3.25	3.356	0.659	0	0.1104	0.3496	2.16098	15.7688	75.8408	5.76943	9	331	3.64348	3	5	1	9	10	312	2.64777	0.0647459	0.930958
no	2.feb	F17	32	26	2.2398	2.67	3.282	0.9877	0	0.145823	0.979687	3.57986	17.7638	70.0281	7.50272	14	983	6.83833	2	10	2	6	18	959	3.77931	0.200493	2.85852
no	2.feb	F18	5	26	0.764921	7.18	2.543	1.78	2.71441	7.93718	8.67518	3.49446	6.09743	64.7442	6.33712	2	7	0.017903	0	1	1	0	1	6	0	0	0.017903
no	2.feb	F19	34	27	1.24781	3.03	3.392	0.4125	0	0.668801	0.360747	0.926189	11.3635	82.2464	4.43436	13	479	4.00782	7	5	1	12	9	458	2.57391	0.0673091	1.3666
no	2.feb	F20	33	27	1.19149	6	2.221	1.195	2.7469	4.20037	5.10578	35.8742	22.3063	26.7544	3.01217	15	37	4.67712	5	8	2	7	27	3	3.77877	0.892374	0.00596768
no	2.feb	F21	34	27	1.06261	12.48	2.018	1.55	7.85996	7.73964	11.3836	13.8423	18.3535	37.5403	3.28066	14	237	10.9269	4	9	1	17	24	196	10.1824	0.159617	0.584833
no	2.feb	F22	34	27	3.29622	8.38	2.514	1.937	1.70863	5.89728	11.1488	9.37484	18.8904	44.1731	8.80698	16	702	5.27162	3	12	1	5	94	603	1.31612	2.15624	1.79926
no	2.feb	F23	32	27	3.90893	6.88	3.485	1.058	1.38454	0.10958	0.714882	2.34641	11.3616	75.1513	8.93168	20	1408	17.9757	6	11	3	14	125	1269	8.83554	5.36263	3.77754
no	2.feb	F24	33	27	1.76299	4.14	2.244	2.382	7.48871	10.5488	10.061	6.89024	12.8997	41.145	10.9666	9	486	4.63247	1	7	1	1	299	186	0	4.07747	0.554994
no	2.feb	F25	33	27	2.43852	2.81	3.285	1.138	0.0929541	0.68786	1.73308	3.776	15.7361	69.3913	8.58276	13	689	7.31598	2	10	1	4	303	382	2.24423	3.93191	1.13983
no	2.feb	F26	34	28	2.48376	4.58	2.888	0.91	0.951894	0.877361	2.14442	17.7048	15.3006	58.0421	4.97881	11	167	1.20237	2	8	1	2	28	137	0.0229898	0.77059	0.408786
no	2.feb	F27	34	28	1.32894	5.94	2.249	1.145	0.252559	2.15224	7.66899	41.6392	11.3959	31.8948	4.99627	12	208	1.20665	1	10	1	1	38	169	0.0229898	0.679391	0.504269
no	2.feb	F28	34	28	1.93839	4.56	3.048	0.7505	0.0468334	0.40447	2.14369	10.6887	12.8451	69.9372	3.93401	19	436	4.3561	3	15	1	7	61	368	2.35213	0.905918	1.09805
no	2.feb	F29	34	28	7.26496	8.74	2.268	2.619	5.43216	5.20609	15.3527	17.8811	15.7544	23.5613	16.8123	8	8	0.0578456	0	7	1	0	7	1	0	0.0548618	0.00298384
no	2.feb	F30	32	28	1.08015	0.94	2.808	0.6099	0	0.032568	0.278863	4.92998	54.7	37.0217	3.03696	4	8	0.089387	1	3	0	1	7	0	0.0229898	0.0663972	0
no	2.feb	F31	33	28	1.26247	1.78	2.924	0.5814	0	0.020399	0.163192	2.57027	49.9531	43.2316	4.06144	7	28	0.401016	2	4	1	4	22	2	0.160265	0.234783	0.00596768
no	2.feb	F32	32	28	1.46637	2.48	0.8972	1.525	32.4687	17.862	6.30902	3.19299	19.5802	18.4653	2.12173	28	240	4.50445	7	18	3	10	100	130	2.68076	0.774558	1.04913
no	2.feb	F33	28	28	1.24103	2.5	2.839	0.7618	0	0	0.658764	15.2321	36.5418	44.0133	3.55402	13	1003	3.60691	3	8	1	4	461	536	1.61044	0.397133	1.59934
no	2.feb	F34	26	28	1.31579	1.96	1.123	1.401	11.3437	13.4369	18.0786	21.0534	26.1153	8.30941	1.6627	13	844	3.24767	2	8	2	3	715	108	1.53508	0.980171	0.732423
yes	3.may	M1	34	24.5	1.10418	2.19	3.435	0.3966	0.0765998	0.0248432	0.186324	1.04134	6.17146	86.8952	5.60421	12	91	1.53096	3	6	2	7	63	20	0.773008	0.701263	0.056693
yes	3.may	M2	32	25.5	1.55247	3.38	1.998	1.735	20.3515	9.08754	2.76446	1.54199	4.7973	60.0704	1.38686	10	25	1.70042	1	8	1	2	17	6	1.49616	0.186362	0.017903
yes	3.may	M3	13	25.5	0.758802	1.16	1.883	1.735	15.4794	8.39725	7.8491	4.28303	4.09962	59.1226	0.76907	10	18	3.33312	3	7	0	6	12	0	3.05423	0.27889	0
yes	3.may	M4	33	24.5	1.43796	2.64	3.091	0.6854	0.458849	0.572955	1.68487	5.43579	17.6378	71.0537	3.15611	16	220	3.57283	3	12	1	5	44	171	2.90229	0.1603	0.510237
yes	3.may	M5	32	24.5	1.54951	2.55	3.095	0.5783	0.227677	0.293911	1.45713	4.41073	22.7553	68.7399	2.11533	18	84	0.573057	2	13	2	6	45	32	0.114949	0.365609	0.0924991
yes	3.may	M6	33	25.5	1.87827	2.57	2.167	1.632	12.0145	5.24879	4.16754	3.08104	12.7992	59.9727	2.71625	8	30	1.75128	1	7	0	2	28	0	1.49616	0.255127	0
yes	3.may	M7	35	25.5	1.18673	4.78	1.943	1.511	6.44124	8.17004	16.2267	14.6546	11.1331	42.4677	0.906637	6	21	3.07254	2	4	0	5	16	0	2.99231	0.0802253	0
yes	3.may	M8	30	26.5	1.28654	2.84	2.093	1.614	6.33822	11.5921	8.16292	10.2687	13.8782	47.9351	1.8247	6	21	2.49615	1	5	0	3	18	0	2.24423	0.251912	0
yes	3.may	M9	30	23	1.34464	3.32	2.325	1.252	1.06709	3.94367	11.8992	19.9148	19.3316	41.2524	2.5912	10	229	6.48062	2	7	1	6	222	1	3.83168	2.64596	0.00298384
yes	3.may	M10	27	25.5	1.12108	1.88	3.371	0.3961	0	0	0.226659	1.55983	9.48054	85.4835	3.24947	16	103	4.39145	5	9	1	10	17	58	4.11567	0.10272	0.173063
yes	3.may	M11	32	24.5	1.29723	2.87	2.879	0.8237	0.134922	1.25789	4.10993	10.1046	23.1381	58.8924	2.36217	20	77	2.46058	2	14	4	2	40	35	1.40614	0.750892	0.303551
yes	3.may	M12	30	24	1.23406	1.95	2.935	0.6702	0.226036	0.791126	2.04897	6.76434	32.2792	55.1612	2.72918	13	47	5.22089	3	8	2	9	25	13	4.56632	0.618772	0.0358061
yes	3.may	M13	32	24	1.6684	4.1	3.074	0.765	0.34577	0.867531	2.46801	6.68144	23.1832	62.1579	4.29624	9	71	7.54159	2	6	1	8	49	14	5.8314	1.66841	0.0417738
yes	3.may	M14	30	23	2.08141	2.47	3.024	0.8098	0.0456962	1.01778	4.18951	7.43187	18.1456	65.2916	3.87795	11	210	7.9725	1	8	1	9	192	7	6.7327	1.21891	0.0208869
yes	3.may	M15	25	23	1.28624	8.26	2.329	1.669	4.92945	9.14402	10.7018	9.46944	10.4244	48.889	6.44189	6	74	1.03746	1	5	0	1	73	0	0.0229898	1.01447	0
yes	3.may	M16	30	24.5	1.59138	2.6	3.362	0.4687	0	0	0.0535795	2.15967	14.6272	77.8737	5.28583	7	9	0.0942951	1	6	0	1	8	0	0	0.0942951	0
yes	3.may	M17	31	24.5	1.74753	2.72	3.061	0.5944	0.0654156	0.419069	1.18361	5.78519	20.5119	68.9828	3.05205	8	27	1.11412	2	5	1	2	11	14	0.748078	0.324273	0.0417738
yes	3.may	M18	25	24.5	1.17647	3.95	2.147	1.67	9.65534	8.69366	13.3574	9.39503	9.13232	46.7342	3.03206	16	220	3.57283	3	12	1	5	44	171	2.90229	0.1603	0.510237
yes	3.may	M19	32	24.5	1.57949	2.5	3.36	0.3982	0	0.0413266	0.219031	1.08896	11.0466	82.7999	4.80422	7	52	1.7181	4	3	0	35	17	0	1.52268	0.195419	0
yes	3.may	M20	34	24.5	0.994972	6.53	2.141	1.185	2.33539	2.90864	8.83744	38.651	20.5924	23.1442	3.53096	10	16	2.63027	3	6	0	5	9	0	2.30615	0.324126	0
yes	3.may	M21	33	24.5	1.7481	10.76	2.298	1.568	4.56385	8.06337	9.46612	10.3392	20.774	43.1886	3.60497	14	70	30.8419	5	8	1	48	21	1	29.9113	0.471489	0.45913
yes	3.may	M22	32	26.5	2.86299	7.09	3.029	0.9892	0.32274	1.58456	5.57174	7.55301	17.0581	57.1272	10.7826	10	49	2.64018	2	8	0	2	47	0	0.759121	1.88106	0
yes	3.may	M23	32	26.5	1.72288	4.23	3.059	1.045	1.53316	2.61339	3.75954	6.70679	17.188	58.5366	9.66253	8	34	5.91335	2	6	0	7	27	0	5.08333	0.830026	0
yes	3.may	M24	32	26.5	1.64346	4.47	3.219	0.8188	0.687779	0.737059	2.50257	7.01491	15.3604	63.1921	10.5052	6	299	3.56221	1	5	0	3	296	0	2.24423	1.31798	0
yes	3.may	M25	30	26.5	1.49455	3.65	3.382	0.5697	0.108702	0.16613	0.812191	2.9124	14.0472	72.2973	9.65605	5	1362	0.982642	0	4	1	0	1360	2	0	0.976674	0.00596768
yes	3.may	M26	29	23.5	1.58974	2.5	2.944	0.9521	0.216577	1.22366	2.86964	15.678	15.1474	57.6852	7.17952	13	32	1.58002	2	9	1	6	22	1	0.863027	0.714013	0.00298384
yes	3.may	M27	29	23.5	2.18159	3.74	2.794	1.088	0.74729	1.47068	4.23826	24.0849	17.2463	44.9764	7.23611	10	30	2.76944	3	7	0	8	22	0	2.26916	0.500277	0
yes	3.may	M28	32	23.5	1.06653	1.55	2.788	0.9636	0.113053	0.981891	2.56883	23.379	11.0541	57.2281	4.67497	5	25	1.54454	1	4	0	1	24	0	0.748078	0.796464	0
yes	3.may	M29	27	26.5	5.98837	14	2.548	1.361	2.16652	1.06216	8.78098	30.0429	17.5268	21.3862	19.0344	6	7	0.469614	1	3	1	1	4	1	0	0.261546	0.208068
yes	3.may	M30	33	26.5	2.61099	1.57	2.737	0.7068	0.0315504	1.17578	2.45041	7.30076	52.6618	33.1973	3.18238	8	57	2.83537	2	6	0	29	28	0	2.57191	0.263462	0
yes	3.may	M31	33	26.5	1.93365	1.74	2.882	0.6002	0	0.0738492	0.687208	3.93657	49.6882	42.5207	3.09346	9	36	0.791916	2	6	1	15	20	1	0.332901	0.459015	0
yes	3.may	M32	33	26.5	2.34141	3.05	2.937	1.083	3.93975	2.6737	2.34325	5.10708	30.4772	51.0279	4.43114	8	12	0.46155	1	5	2	1	7	4	0	0.0394462	0.422104
yes	3.may	M33	33	26.5	1.0537	1.3	2.895	0.7716	0	0.190024	0.681607	11.8187	39.8162	43.4638	4.02974	7	29	1.12107	2	5	0	3	26	0	0.794058	0.327012	0
yes	3.may	M34	32	26.5	2.40939	2.88	1.198	1.515	13.8616	10.3895	15.6482	20.7316	27.0527	9.99134	2.32505	6	141	0.0901838	1	4	0	1	132	0	0	0.0901838	0
yes	4.jul	J1	32	21	1.08426	3.16	3.319	0.3145	0	0	0	1.00542	6.16103	91.3325	1.501	17	209	3.91702	4	12	1	13	192	4	1.71411	2.19098	0.0119354
yes	4.jul	J2	31	21	1.0858	6.06	2.375	1.423	10.6969	4.37831	1.70091	1.49333	6.46685	73.6602	1.60347	14	151	3.77412	3	10	1	14	42	95	3.13219	0.358467	0.283465
yes	4.jul	J3	31	20	0.860969	5.92	1.085	1.674	19.8077	17.8842	16.7459	9.41861	4.27207	29.0147	2.85677	9	39	2.27774	1	7	1	1	36	2	0	2.27177	0.00596768
yes	4.jul	J4	32	21	1.18598	4.72	3.295	0.4375	0.11037	0.181007	0.529778	1.76151	15.2819	79.2106	2.92482	19	485	7.21864	4	13	2	9	38	438	5.09418	0.361388	1.76307
yes	4.jul	J5	32	21	1.51484	2.96	2.967	0.8128	0.567662	1.66348	4.92598	5.82841	15.5015	68.9137	2.59918	12	165	5.63592	4	7	1	13	139	13	3.9569	1.64024	0.0387899
yes	4.jul	J6	32	21	2.87255	9.14	2.473	1.387	4.17111	6.43678	6.861	3.77059	6.80412	70.9326	1.02382	12	60	4.5057	1	11	0	5	55	0	3.74039	0.765313	0
yes	4.jul	J7	17	21	1.09799	3.46	2.054	1.589	7.68597	11.3907	9.5415	13.1428	8.17572	49.4723	0.591066	8	48	3.66425	2	6	0	4	44	0	2.83909	0.825162	0
yes	4.jul	J8	23	21	0.901639	2.4	2.02	1.557	6.29978	9.95955	11.0488	14.7824	10.9519	46.0516	0.905988	10	90	5.80935	2	7	1	7	82	1	4.52739	1.27897	0.00298384
yes	4.jul	J9	32	21	1.18618	3.05	3.175	0.8682	0.291479	1.63518	4.00422	6.10452	10.4746	70.8542	6.6358	11	140	6.41385	1	9	1	7	132	1	5.23655	1.17432	0.00298384
yes	4.jul	J10	30	20	1.11123	3.71	3.352	0.3899	0	0	0.225632	1.47071	10.4078	83.3832	4.51264	23	717	2.62061	3	17	3	11	44	662	0.0919593	0.35125	2.1774
yes	4.jul	J11	32	21	1.12062	1.84	2.495	1.246	1.63046	5.52452	8.64267	11.1152	22.1312	49.0937	1.8622	15	96	3.88453	2	9	4	5	61	30	2.30687	0.624817	0.952845
yes	4.jul	J12	32	20	0.9726	4.38	2.839	0.9098	2.09915	2.6608	4.12239	6.55116	29.2037	53.9879	1.37485	18	46	3.71693	3	12	2	6	34	5	3.03124	0.465688	0.220003
yes	4.jul	J13	31	21	1.76594	4.3	2.995	0.8529	0.810214	2.12129	3.4955	5.02333	27.5115	57.8394	3.19877	14	54	7.20371	5	9	0	13	41	0	5.26201	1.9417	0
yes	4.jul	J14	30	21	1.71647	3.29	3.104	0.8627	0.422482	1.62897	2.88381	8.4097	13.5236	67.5277	5.60367	10	83	7.19371	2	7	1	9	67	7	6.02355	1.14927	0.0208869
yes	4.jul	J15	29	20	1.03771	2.67	3.474	0.9962	5.48252	2.31138	1.68421	1.17334	3.04654	77.5715	8.7305	6	472	5.69721	2	3	1	3	461	8	0.825926	4.84742	0.0238707
yes	4.jul	J16	31	20	2.83292	3.28	3.36	0.4282	0	0	0.49608	1.54132	12.6899	80.3283	4.94447	9	73	0.821041	1	7	1	4	68	1	0.0919593	0.726098	0.00298384
yes	4.jul	J17	29	20	1.70217	1.89	3.253	0.5885	0.0348797	0.139519	0.990993	3.48797	18.9171	69.7983	6.63124	9	175	1.45435	2	6	1	3	19	153	0.794058	0.20376	0.456528
yes	4.jul	J18	18	20	1.19742	3.96	2.641	1.435	2.17595	6.81728	8.14784	8.66632	8.76419	59.5336	5.89485	7	661	18.2118	1	5	1	1	637	23	0.0912951	18.0518	0.0686283
yes	4.jul	J19	31	20	1.56472	1.58	3.408	0.4304	0	0.102674	0.412748	1.08834	9.03323	82.6605	6.70253	10	107	1.28844	2	7	1	3	103	1	0.0849039	1.20056	0.00298384
yes	4.jul	J20	31	20	1.43365	4.44	2.441	1.099	1.80739	2.49902	3.99974	28.8769	27.5371	30.5603	4.71965	18	100	11.9838	4	12	1	34	62	3	11.3347	0.640177	0.00895152
yes	4.jul	J21	32	20	1.58314	4.62	2.187	1.529	6.40521	7.37852	8.82178	11.7512	19.2013	41.4132	5.02875	12	50	22.0059	4	8	0	34	16	0	21.4402	0.565683	0
yes	4.jul	J22	30	19	5.3522	6.02	3.258	0.6861	0	0.0529526	0.449038	5.63204	20.211	61.065	12.59	12	63	2.0477	3	7	2	7	48	8	0.811932	0.755752	0.480016
yes	4.jul	J23	31	20	3.84414	4.53	3.292	0.7746	0.621315	1.04609	2.18517	4.4443	14.0366	63.7313	13.9352	14	53	11.3365	7	7	0	20	33	0	10.8866	0.449829	0
yes	4.jul	J24	31	20	1.50578	3.04	3.401	0.5384	0	0	0.348246	1.89487	15.1446	72.6155	9.99672	10	1061	4.10706	2	7	1	2	916	143	0.0229898	3.65738	0.426689
yes	4.jul	J25	31	20	1.85185	2.8	3.287	0.7257	0.107125	0.445303	1.46194	6.01159	14.5438	66.241	11.1893	7	586	7.45529	2	4	1	5	577	4	3.03124	4.41212	0.0119354
yes	4.jul	J26	30	20	1.67411	1.44	2.878	0.8504	0.672544	1.21791	1.95297	16.1734	16.6153	60.044	3.32392	16	83	2.49999	3	12	1	4	78	1	1.00261	1.28931	0.208068
yes	4.jul	J27	30	20	1.08495	2.3	2.901	1.063	1.25738	1.83926	3.79222	14.2214	10.4894	62.2695	6.13087	12	54	3.50496	3	9	0	10	44	0	2.25194	1.25301	0
yes	4.jul	J28	30	20	1.12949	0.84	2.741	0.9381	0.165385	0.372116	1.19077	34.2905	11.9635	48.096	3.92169	10	51	1.84361	3	7	0	8	43	0	0.924941	0.918667	0
yes	4.jul	J29	30	20	6.41149	6.73	2.958	1.185	0.0959372	0.258807	3.04768	24.0869	18.6921	24.5264	29.2921	10	45	0.930997	3	6	1	3	40	2	0.809992	0.115038	0.00596768
yes	4.jul	J30	31	20	1.20032	0.86	2.895	0.6943	0	0	0.177426	5.56828	49.9742	37.9629	6.31718	10	71	1.25927	2	6	2	8	58	5	0.459496	0.579768	0.220003
yes	4.jul	J31	31	20	2.60189	1.61	3.009	0.6373	0.0163552	0.0224884	0.398659	4.24214	43.9813	46.6206	4.71849	10	64	0.674301	1	9	0	7	57	0	0.160929	0.513372	0
yes	4.jul	J32	32	20	3.9551	4.68	0.678	1.412	28.5435	24.8122	12.0263	8.12852	13.3769	10.1159	2.99669	17	75	3.12105	3	13	1	4	63	8	2.09551	1.00167	0.0238707
yes	4.jul	J33	32	21	1.21188	0.98	2.984	0.7558	0	0.0713747	0.344638	9.47244	37.2168	47.6864	5.20831	15	60	1.84033	2	12	1	12	45	3	1.00097	0.830414	0.00895152
yes	4.jul	J34	31	21	1.42161	1.52	2.245	1.179	5.4324	2.78285	3.88614	28.6467	40.5164	13.9081	4.82743	15	435	6.21007	2	10	3	9	386	40	4.60524	0.619163	0.985667

## Sheet: multi
site	Neritina.virginea	Cerithium.atratum	Nassarius.vibex	Olivella.minuta	Abra.sp1	Donax.gemmula	Phyllodoce.mucosa	Eteone.alba	Hermundura.tricuspis	Sigambra.grubii	Sigambra.tentaculata	Ancistrosyllis.jonesi	Laeonereis.culveri	Glycinde.multidens	Goniada.litorea	Hemipodia.simplex	Dorvillea.sp..0	Nematonereis.hebes	Scoletoma.tetraura	Scoloplos.(leodamas).sp..1	Haploscoloplos.sp..1	Naineris.setosa	Protoaricia.sp..1	Aricidea.(Aricidea).fragilis	Aricidea.(Allia).albatrossae	Aricidea.cf..wassi	Scolelepis.squamata	Scolelepis.texana	Scolelepis.sp.1	Sternaspis.capilata	Armandia.hossfeldi	Armandia.agilis	Armandia.polyophtalama	Capitella.capitata	Capitella.sp.1	Heteromastus.filiformis	Mediomastus.californiensis	Notomastus.hemipodus	Notomastus.lobatus	Scyphoproctus.sp..1	Oligochaeta	Ogyrides.alphaerostris	Dendobranchiata	Processa.bermudensis	Pagurus.criniticornis	Clibanarius.vittatus	Clibanarius.antillensis	Callinectes.danae	Panopeus.occidentalis
S1	0	0	0	8	0	0	0	0	2	0	0	0	0	1	1	0	0	0	0	1	29	0	0	0	0	0	0	0	0	0	38	2	1	0	0	0	2	0	0	0	0	0	0	0	0	0	0	0	0
S2	0	2	0	14	0	0	0	0	1	0	0	0	0	1	1	0	0	0	0	2	3	0	0	1	0	0	0	0	0	0	0	0	0	0	0	1	14	1	0	0	0	0	0	1	0	0	0	0	0
S3	0	0	0	0	0	0	0	0	2	0	0	0	5	2	0	0	0	0	0	2	0	0	0	0	0	0	0	0	0	0	1	0	0	0	0	3	0	0	0	0	0	0	0	0	0	0	0	0	0
S4	0	12	0	5	0	0	1	0	0	0	0	0	0	2	0	0	0	0	0	4	5	1	0	0	0	0	0	0	0	0	0	0	0	0	0	1	15	0	0	10	0	0	0	0	0	0	0	0	0
S5	0	0	0	41	0	1	0	0	5	0	0	0	0	3	1	0	0	0	0	3	17	0	0	9	0	0	0	0	0	0	16	0	0	0	0	1	5	0	0	0	0	0	0	0	0	0	0	2	0
S6	0	0	0	8	0	0	0	0	1	0	0	0	0	2	0	0	0	0	0	11	14	0	0	0	0	0	0	0	0	0	2	1	0	0	0	0	0	0	0	0	0	0	0	0	0	0	0	0	0
S7	0	0	0	13	0	0	0	0	0	1	0	0	0	6	0	0	0	0	1	2	17	0	0	0	0	0	0	0	0	0	0	0	0	0	0	0	0	0	0	0	0	0	0	0	0	0	0	0	0
S8	0	0	0	0	0	0	1	0	0	0	0	0	74	0	0	0	0	0	0	0	7	0	0	0	0	0	0	0	0	0	6	0	0	0	0	0	0	0	0	0	0	0	0	0	0	0	0	0	0
S9	0	1	0	5	0	0	0	0	0	0	0	0	0	2	0	0	0	0	0	2	0	0	0	0	0	0	0	0	0	0	0	0	0	0	0	0	0	0	0	0	0	1	0	0	1	0	0	1	0
S10	0	0	0	17	0	0	0	0	2	0	0	0	0	1	0	0	0	0	0	3	16	2	0	2	0	0	0	0	0	0	8	1	0	0	0	0	21	0	0	0	0	0	0	0	0	0	0	0	0
S11	1	0	0	0	0	0	0	0	1	1	0	0	0	2	0	0	0	0	0	15	1	0	0	1	0	0	0	0	0	0	0	0	0	0	0	0	13	0	0	0	0	0	0	0	0	0	0	0	0
S12	0	0	0	0	0	0	0	0	0	0	0	0	0	1	0	0	0	0	0	5	3	0	0	0	0	0	0	0	0	0	0	0	0	0	0	1	0	0	0	0	0	0	0	0	0	0	0	0	0
S13	1	0	0	0	0	0	0	0	1	0	0	0	0	0	0	0	0	0	0	0	0	0	0	0	0	0	0	0	0	0	0	0	0	0	0	0	0	0	0	0	0	0	0	0	0	0	0	0	0
S14	0	0	0	0	0	0	0	0	0	0	0	0	0	4	0	0	0	0	0	0	0	0	0	0	0	0	0	0	0	0	0	0	0	0	0	0	0	0	0	0	0	0	0	0	0	0	0	0	0
S15	0	0	0	0	0	0	0	0	0	0	0	0	132	0	0	0	0	0	0	0	0	0	0	0	0	0	20	0	0	0	0	0	0	0	0	1	0	0	0	0	0	0	0	0	0	0	0	0	0
S16	0	0	0	19	0	0	0	0	4	0	0	0	0	1	0	0	0	0	0	7	7	1	1	0	0	0	10	0	0	0	4	0	0	0	0	1	10	0	0	0	0	0	0	0	0	0	0	0	0
S17	0	0	0	7	0	0	1	0	0	1	0	0	0	1	0	0	0	0	0	1	0	1	0	0	0	0	0	0	0	0	0	0	0	0	0	1	7	0	0	0	0	0	0	0	0	0	0	0	0
S18	0	0	0	0	0	0	0	0	0	0	0	0	13	0	0	0	0	0	0	0	0	0	0	0	0	0	25	0	0	0	0	0	0	3	0	0	0	0	0	0	0	0	0	0	0	0	0	0	0
S19	0	0	0	7	0	0	0	1	1	0	0	0	0	1	0	0	0	0	0	1	7	0	0	0	0	0	0	0	0	0	8	0	0	0	0	0	8	0	0	0	0	0	0	0	0	0	0	0	0
S20	1	49	3	8	0	0	0	0	3	0	0	0	0	1	0	0	1	0	0	15	3	3	1	0	0	0	0	0	0	0	0	1	0	0	0	1	11	0	0	3	0	0	0	0	0	0	0	0	0
S21	7	18	0	0	0	0	0	0	1	1	0	0	0	1	0	0	0	0	0	18	0	0	0	1	0	0	0	0	0	0	0	0	0	0	0	0	4	0	0	0	0	0	0	0	0	0	0	0	1
S22	0	0	0	2	0	0	0	0	3	0	0	0	0	3	0	0	0	0	0	23	2	2	35	0	0	0	0	0	0	0	0	0	0	1	0	0	1	0	1	0	0	0	0	0	1	0	0	0	0
S23	0	0	0	0	0	0	0	0	0	0	0	0	0	0	0	0	0	0	0	10	0	1	0	0	0	0	0	0	0	0	0	0	0	0	0	1	3	1	0	0	0	0	0	0	0	0	0	0	0
S24	0	2	0	2	0	0	0	1	1	0	0	0	0	2	0	0	0	0	0	5	3	0	0	0	0	0	0	0	0	0	0	0	0	0	0	6	0	0	0	0	0	0	0	0	0	0	0	0	0
S25	0	0	0	0	0	0	1	0	0	0	0	0	166	0	0	0	0	0	0	0	0	0	0	0	0	0	0	0	0	0	0	0	0	66	0	22	0	0	0	0	0	0	0	0	0	0	0	0	0
S26	0	0	0	3	0	0	0	0	5	0	0	0	0	0	0	0	0	0	0	18	3	0	0	0	0	0	0	0	0	0	3	0	0	0	0	0	8	0	0	0	0	0	0	0	0	0	0	0	0
S27	0	0	0	2	0	0	0	0	0	0	0	0	0	2	0	0	0	0	0	59	17	0	1	0	0	0	0	0	0	0	3	0	1	0	0	0	4	0	0	0	0	0	0	0	0	0	0	0	0
S28	0	0	0	2	0	0	0	0	2	0	0	0	0	0	0	0	0	0	1	51	3	0	0	2	0	0	0	0	0	0	11	0	0	0	0	0	5	0	0	0	0	0	0	0	0	0	0	0	0
S29	0	0	0	3	0	0	0	0	0	0	0	0	1	2	0	0	0	0	0	65	29	0	0	0	0	0	0	0	0	0	0	0	0	22	0	11	1	0	0	0	0	0	0	0	0	0	0	0	0
S30	0	0	0	5	0	0	0	0	4	0	0	0	0	0	0	0	0	0	1	0	8	0	0	0	0	0	0	0	0	0	14	0	0	0	0	0	0	1	0	0	0	0	0	0	0	0	0	0	0
S31	0	0	0	5	0	0	0	0	7	0	2	0	0	0	0	0	0	0	0	10	15	0	0	0	0	0	0	0	0	0	68	2	4	2	0	0	4	0	0	0	0	0	0	0	0	0	0	1	0
S32	1	1	0	0	1	0	0	0	1	0	0	0	0	0	0	0	1	0	0	2	0	3	0	0	0	0	0	0	0	0	0	0	0	0	0	1	0	0	0	0	0	0	0	0	0	0	0	0	0
S33	0	0	1	0	0	0	0	0	0	2	0	0	0	0	0	0	0	0	0	19	5	0	0	0	0	0	0	0	0	0	0	0	0	71	0	7	0	0	0	0	0	0	0	0	1	0	0	0	0
S34	0	0	0	0	0	0	1	0	0	0	0	0	0	5	0	0	0	0	0	5	1	0	0	0	0	0	0	0	0	0	0	0	0	199	0	10	0	0	0	0	0	0	0	0	1	0	0	0	0
F1	0	0	1	0	0	0	0	0	2	0	0	0	0	0	2	0	0	0	0	2	0	0	0	0	0	0	0	0	0	0	0	0	0	0	0	0	6	0	0	0	0	0	0	0	0	0	0	0	0
F2	0	0	0	0	0	0	0	0	3	0	0	0	0	0	0	0	0	0	1	0	0	3	0	0	0	0	0	0	0	0	0	0	0	0	0	1	4	0	0	0	0	0	0	0	0	0	0	0	0
F3	0	0	0	0	0	0	1	0	0	1	0	0	0	0	0	0	0	0	3	0	0	0	0	0	0	0	0	0	7	0	0	0	0	60	16	23	1	0	0	1	0	0	0	0	0	0	0	0	0
F4	0	0	0	1	0	0	0	0	0	0	0	0	0	1	0	0	0	2	0	0	0	1	0	0	0	0	0	0	0	0	0	0	0	1	0	2	11	0	0	16	0	0	0	0	0	0	0	0	0
F5	0	1	0	6	0	0	0	0	5	0	0	0	0	0	0	0	0	0	1	2	0	0	0	3	0	0	0	0	0	0	0	0	0	0	0	0	2	0	0	18	0	0	0	0	1	0	0	0	0
F6	0	0	0	0	0	0	0	0	1	0	0	0	0	0	0	0	0	0	1	12	0	0	0	0	0	0	0	0	0	0	0	0	0	0	0	5	0	0	0	0	0	0	0	0	0	0	0	0	0
F7	0	0	0	0	0	0	0	0	0	0	0	0	0	0	0	0	0	0	1	0	0	0	0	0	0	0	0	0	0	0	0	0	0	0	0	7	0	0	0	0	0	0	0	0	0	0	0	0	0
F8	0	0	0	0	0	0	0	0	0	0	0	0	3	0	0	0	0	0	0	3	0	0	0	0	0	0	0	0	0	0	0	0	0	0	0	0	1	0	0	0	0	0	0	0	0	0	0	0	0
F9	0	0	0	0	0	0	1	0	1	0	0	0	6	0	0	0	0	0	0	6	0	0	0	0	0	0	0	0	0	0	0	0	0	11	0	25	0	0	0	0	0	0	0	0	0	0	0	0	0
F10	0	0	0	2	0	0	0	0	3	0	0	0	0	3	0	0	0	0	0	5	0	1	0	0	0	0	0	0	0	0	0	0	0	0	0	1	3	0	0	0	0	0	0	0	0	0	0	0	0
F11	0	0	0	0	0	0	0	0	1	0	0	0	0	1	0	0	1	0	2	0	0	0	0	0	0	0	0	0	0	0	0	0	0	0	0	0	2	0	0	0	0	0	0	0	0	0	0	0	0
F12	0	0	0	0	0	0	0	0	2	0	0	0	0	1	0	0	0	0	0	8	0	1	0	0	0	0	0	0	0	0	0	0	0	0	0	0	0	0	0	0	0	0	0	0	0	0	0	0	0
F13	0	0	1	0	0	0	0	0	0	0	0	0	6	1	0	0	0	0	0	7	0	0	0	0	0	0	0	0	0	0	0	0	0	0	0	1	0	0	0	0	0	0	0	0	0	0	0	0	0
F14	0	0	0	0	0	0	0	0	1	0	0	0	0	3	0	0	0	0	0	0	0	0	0	0	0	0	0	0	0	0	0	0	0	0	0	7	0	0	0	0	0	0	0	0	0	0	0	0	0
F15	0	0	0	1	0	0	0	0	0	0	0	0	12	0	0	0	0	0	0	0	0	0	0	0	0	0	0	0	115	0	0	0	0	0	0	0	0	0	0	0	0	0	0	0	0	0	0	0	0
F16	0	0	0	7	0	0	0	0	0	0	0	0	0	0	2	0	0	0	0	4	0	0	0	0	0	0	0	0	0	0	0	0	0	1	0	0	1	0	0	0	0	0	0	0	0	0	0	0	0
F17	0	0	0	0	0	0	0	0	2	0	0	0	0	0	0	0	0	0	0	1	0	2	0	0	0	0	0	0	0	0	0	0	0	2	0	2	5	0	0	0	0	0	0	0	0	0	0	0	0
F18	0	0	0	0	0	0	0	0	0	0	0	0	0	0	1	0	0	0	0	0	0	0	0	0	0	0	0	0	0	0	0	0	0	0	0	0	0	0	0	0	0	0	0	0	0	0	0	0	0
F19	0	0	0	5	0	0	1	0	3	0	0	0	0	0	0	0	0	0	0	2	1	0	0	0	0	0	0	0	0	0	0	0	0	0	0	0	0	0	0	0	0	0	0	0	0	0	0	0	0
F20	0	0	0	0	0	0	0	0	4	0	0	0	0	1	0	0	0	0	0	11	2	2	0	0	0	0	0	0	0	0	3	0	0	0	0	0	0	0	0	0	0	0	0	0	0	0	0	0	0
F21	2	9	0	0	0	0	0	0	1	0	0	0	0	0	1	0	0	1	0	6	0	0	0	0	0	0	0	0	0	0	0	0	0	0	0	0	4	0	0	0	0	0	0	0	0	0	0	0	0
F22	0	2	1	0	0	0	0	0	1	0	0	0	0	3	0	0	0	0	0	17	0	5	53	0	0	0	0	0	0	0	0	0	0	0	0	1	1	1	0	0	0	0	0	0	0	0	0	0	0
F23	1	1	0	0	0	0	0	0	0	0	0	0	0	1	0	0	0	0	1	13	0	46	0	0	0	0	0	0	0	0	0	0	0	18	0	4	2	0	0	0	0	0	0	0	0	0	0	1	2
F24	0	0	0	0	0	0	0	0	0	0	0	0	50	0	0	0	0	0	0	0	0	0	0	0	0	0	0	0	0	0	0	0	0	222	1	2	0	0	0	0	0	0	0	0	0	0	0	0	0
F25	0	0	0	0	0	0	0	0	0	0	0	0	44	0	0	0	0	0	0	0	0	0	0	0	0	0	1	0	0	0	0	0	0	226	2	6	1	0	0	0	0	0	0	0	0	0	0	0	0
F26	0	0	0	1	0	0	0	0	3	0	0	0	0	2	0	0	0	0	1	15	0	0	0	0	0	0	0	0	0	0	0	0	0	0	0	0	0	1	0	0	0	0	0	0	0	0	0	0	0
F27	0	0	0	1	0	0	0	0	2	0	0	0	0	1	0	0	0	0	1	19	1	1	0	0	0	0	0	0	0	0	3	0	0	0	0	1	0	0	0	0	0	0	0	0	0	0	0	0	0
F28	0	0	0	3	0	0	0	0	2	0	0	0	0	1	0	1	0	0	1	37	0	1	0	0	0	0	0	0	0	0	0	0	0	4	0	0	4	0	0	0	0	0	0	0	0	0	0	0	0
F29	0	0	0	0	0	0	0	0	1	0	0	0	0	1	0	0	0	0	0	1	0	0	0	0	1	0	0	0	0	0	1	0	0	0	0	0	1	0	0	0	0	0	0	0	0	0	0	0	0
F30	0	0	0	1	0	0	0	0	5	0	0	0	0	0	0	0	0	0	0	1	1	0	0	0	0	0	0	0	0	0	0	0	0	0	0	0	0	0	0	0	0	0	0	0	0	0	0	0	0
F31	0	0	0	3	0	0	0	0	7	0	0	0	0	1	0	0	0	0	0	0	1	0	0	0	0	0	0	0	0	0	13	0	0	0	0	0	0	0	0	0	0	0	0	0	0	0	0	0	0
F32	2	1	2	2	0	0	0	0	2	0	0	0	0	2	0	0	0	0	0	13	0	8	2	0	0	0	0	0	0	0	0	0	0	21	0	1	2	1	1	3	0	0	0	0	1	0	1	0	0
F33	0	0	0	1	0	0	0	0	1	0	0	0	0	2	0	0	0	0	0	10	0	0	0	0	0	0	0	0	0	0	0	0	0	441	0	2	0	0	0	0	2	0	0	0	0	0	0	0	0
F34	0	0	0	0	0	0	0	0	0	0	0	0	7	0	0	0	0	0	0	6	0	0	0	0	0	0	0	0	0	0	0	0	0	663	20	8	0	0	0	0	18	0	0	0	2	0	0	0	0
M1	0	1	0	5	0	0	0	0	5	0	0	0	0	0	0	0	0	0	0	0	1	0	0	0	0	0	0	0	0	0	52	3	0	0	0	0	0	0	0	0	0	0	0	1	0	0	0	0	0
M2	0	0	0	0	0	0	0	0	1	0	0	0	0	0	0	0	0	0	0	0	0	2	0	0	0	0	0	0	0	0	1	1	0	2	0	0	5	1	0	0	0	0	0	0	0	0	0	0	0
M3	0	0	0	1	0	0	0	0	2	1	0	0	0	0	0	0	0	0	1	0	0	0	0	0	0	0	0	0	0	0	0	0	0	1	0	3	0	0	0	0	0	0	0	0	0	0	0	0	0
M4	0	1	0	0	0	0	0	0	1	0	0	0	0	1	0	0	0	0	0	0	1	0	0	0	0	0	0	0	0	13	1	0	0	3	0	0	12	2	0	0	0	0	0	0	0	0	0	0	0
M5	0	0	0	5	0	0	0	0	1	0	0	0	0	1	0	0	0	0	0	2	0	0	0	3	0	0	0	0	0	0	19	0	0	1	0	9	2	0	0	0	0	0	0	0	0	0	0	1	0
M6	0	0	0	0	0	0	0	0	1	0	0	0	0	2	0	0	0	0	0	7	2	0	0	0	0	0	0	0	0	0	3	0	0	2	0	11	0	0	0	0	0	0	0	0	0	0	0	0	0
M7	0	0	0	0	0	0	0	0	2	0	0	0	0	0	0	0	0	0	0	2	0	0	0	0	0	0	0	0	0	0	0	0	0	3	0	9	0	0	0	0	0	0	0	0	0	0	0	0	0
M8	0	0	0	0	0	0	0	0	0	0	0	0	3	0	0	0	0	0	2	0	0	0	0	0	0	0	0	0	0	0	0	0	0	9	0	3	0	0	0	0	0	0	0	0	0	0	0	0	0
M9	0	0	0	0	0	0	0	0	0	0	0	0	27	0	0	0	0	0	0	1	0	0	0	0	0	0	0	0	0	0	0	0	0	149	0	27	0	0	0	0	0	0	0	0	0	0	0	0	0
M10	0	5	0	2	0	0	0	0	0	0	0	0	0	1	0	0	0	0	0	1	0	0	0	2	0	0	0	0	0	0	0	0	0	0	0	0	7	0	0	0	0	0	0	0	0	0	0	0	0
M11	0	1	0	0	0	0	0	0	0	0	1	0	0	1	0	0	0	0	0	4	0	1	0	1	0	0	0	0	0	1	0	0	0	5	0	4	9	0	0	0	0	0	0	1	1	0	0	0	0
M12	0	0	1	0	0	0	0	0	5	0	0	0	0	0	0	0	0	0	0	1	0	0	0	0	0	0	0	0	0	0	0	0	0	2	0	6	0	0	0	0	0	0	0	0	0	0	0	0	1
M13	1	0	0	0	0	0	0	0	0	0	0	0	3	0	0	0	0	0	0	5	0	0	0	0	0	0	0	0	0	0	0	0	0	17	0	13	0	0	0	0	0	0	0	0	0	0	0	0	0
M14	0	0	0	0	0	0	0	0	1	0	0	0	3	3	0	0	0	0	0	0	0	0	0	0	0	0	0	0	0	0	0	0	0	158	0	17	0	0	0	0	2	0	0	0	0	0	0	0	0
M15	0	0	0	1	0	0	0	0	0	0	0	0	6	0	0	0	0	0	0	2	0	0	0	0	0	0	48	0	0	0	0	0	0	16	0	1	0	0	0	0	0	0	0	0	0	0	0	0	0
M16	0	0	0	0	0	0	0	0	1	0	0	0	0	1	0	0	0	0	0	1	0	0	0	0	0	0	0	0	0	0	3	0	0	0	0	0	1	0	0	0	0	0	0	0	0	0	0	0	0
M17	0	0	0	0	0	0	0	0	0	0	0	0	0	0	0	0	0	0	0	1	0	0	0	0	0	0	0	0	0	0	0	0	0	1	0	0	7	0	0	0	0	0	0	0	0	0	0	0	0
M18	0	1	0	0	0	0	0	0	1	0	0	0	0	1	0	0	0	0	0	0	1	0	0	0	0	0	0	0	0	13	1	0	0	3	0	0	12	2	0	0	0	0	0	0	0	0	0	0	0
M19	0	0	0	32	0	0	0	0	0	0	0	0	0	2	0	0	0	0	0	0	0	0	0	0	0	0	0	0	0	0	12	0	0	0	0	0	3	0	0	0	0	0	0	0	0	0	0	0	0
M20	0	0	0	1	0	0	0	0	0	0	0	0	0	0	0	0	0	0	0	1	0	0	0	0	0	0	0	0	0	0	4	0	0	0	0	0	1	0	0	0	0	0	0	0	0	0	0	0	0
M21	12	30	0	0	0	0	0	0	2	0	0	0	0	1	1	0	0	0	0	11	0	0	0	0	0	0	0	0	0	0	2	1	0	0	0	2	0	0	0	0	0	0	0	0	0	1	0	0	0
M22	0	0	0	0	0	0	0	0	1	0	0	0	0	1	0	0	0	0	0	8	0	1	14	0	0	0	0	0	0	8	0	0	0	0	0	8	0	0	0	0	0	0	0	0	0	0	0	0	0
M23	1	0	0	0	0	0	0	0	0	0	0	0	0	0	0	0	0	0	1	4	0	0	0	0	0	0	0	0	0	0	0	0	0	15	0	2	0	0	0	0	0	0	0	0	0	0	0	0	0
M24	0	0	0	0	0	0	0	0	0	0	0	0	5	0	0	0	0	0	0	0	0	0	0	0	0	0	0	0	0	0	0	0	0	277	0	9	0	0	0	0	0	0	0	0	0	0	0	0	0
M25	0	0	0	0	0	0	0	0	0	0	0	0	4	0	0	0	0	0	0	0	0	0	0	0	0	0	0	0	0	0	0	0	0	1348	0	7	0	0	0	0	0	0	0	0	0	0	0	0	0
M26	0	0	0	5	0	0	0	0	2	0	0	0	0	2	0	0	0	0	1	6	0	0	0	0	0	0	0	1	0	0	6	0	0	0	0	0	0	0	0	0	0	0	0	0	0	0	0	0	0
M27	0	1	0	5	0	0	0	0	1	0	0	0	0	1	0	0	0	0	0	11	0	0	0	0	0	0	0	0	0	0	6	0	0	0	0	0	0	0	0	0	0	0	0	0	0	0	0	0	0
M28	0	0	0	0	0	0	0	0	2	0	0	0	0	0	0	0	0	0	0	19	0	0	1	0	0	0	0	0	0	0	0	0	0	0	0	0	0	0	0	0	0	0	0	0	0	0	0	0	0
M29	0	0	0	0	0	0	0	0	0	0	0	0	0	0	0	0	0	0	0	0	0	0	0	0	0	0	0	0	0	0	0	0	0	1	0	2	0	0	0	0	1	0	0	0	1	0	0	0	0
M30	0	3	0	26	0	0	0	0	2	0	0	0	0	0	1	1	0	0	0	0	0	0	0	0	0	0	0	0	0	0	21	0	0	0	0	0	0	1	0	0	0	0	0	0	0	0	0	0	0
M31	0	0	0	14	0	0	0	0	2	0	0	0	0	0	0	0	0	0	0	1	0	0	2	0	0	0	0	0	0	0	13	0	0	0	0	1	0	0	0	0	0	0	0	0	0	0	0	0	0
M32	0	0	0	0	0	0	0	0	0	0	0	0	0	0	0	0	0	0	0	1	0	0	1	0	0	0	0	0	0	0	0	0	0	2	0	2	0	0	0	0	0	0	0	0	2	0	0	0	0
M33	0	0	0	2	0	0	0	0	1	1	0	0	0	0	0	0	0	0	0	22	0	0	0	0	0	0	0	0	0	0	0	0	0	0	0	1	0	0	0	0	0	0	0	0	0	0	0	0	0
M34	0	0	0	0	0	0	0	0	0	1	0	0	0	0	0	0	0	0	0	0	0	0	0	0	0	0	0	0	0	0	0	0	0	121	2	8	0	0	0	0	8	0	0	0	0	0	0	0	0
J1	0	0	0	9	0	0	0	0	4	1	0	0	0	1	0	0	0	0	0	1	6	0	0	0	0	0	0	0	0	0	164	0	0	1	0	10	1	0	0	0	0	0	0	0	0	0	0	0	0
J2	0	1	0	10	0	0	0	0	1	0	0	0	0	1	0	0	0	0	0	7	2	0	0	0	0	0	0	0	0	0	12	3	0	2	0	9	0	0	0	0	0	0	0	0	0	0	0	0	0
J3	0	0	0	0	0	0	0	0	0	0	0	0	25	0	0	0	0	0	0	0	0	0	0	0	0	0	3	0	0	0	0	0	0	3	0	1	2	0	0	0	0	0	0	0	0	0	0	0	0
J4	0	2	0	1	1	0	0	0	0	0	0	0	0	4	0	0	0	2	0	7	1	1	0	0	0	0	0	0	0	0	1	0	0	1	0	2	9	0	0	0	0	0	0	0	0	0	1	0	0
J5	0	0	0	5	0	0	0	0	1	0	0	0	0	1	1	0	0	0	0	0	3	0	0	1	0	0	0	0	0	0	131	0	0	0	0	0	0	1	0	0	0	0	0	0	0	0	0	0	0
J6	0	0	0	0	0	0	0	0	0	0	0	0	0	1	0	0	0	0	0	8	2	1	0	1	0	0	0	0	0	0	16	0	0	1	0	12	6	0	0	0	0	0	0	0	0	0	0	0	0
J7	1	0	0	0	0	0	0	0	0	0	0	0	0	1	0	0	0	0	0	3	0	0	0	0	0	0	0	0	0	0	14	0	0	1	0	23	0	0	0	0	0	0	0	0	0	0	0	0	0
J8	0	0	0	0	0	0	0	0	0	2	0	0	3	0	0	0	0	0	0	0	0	0	0	0	0	0	0	0	0	0	2	0	0	8	0	62	0	0	0	0	0	0	0	0	0	0	0	0	0
J9	0	0	0	0	0	0	0	0	0	2	0	0	5	3	0	0	0	0	0	8	0	1	0	0	0	0	0	0	0	0	2	0	0	45	0	65	0	0	0	0	0	0	0	0	0	0	0	0	0
J10	0	0	0	4	0	0	0	0	0	0	0	0	0	2	0	0	0	0	0	3	6	0	0	1	0	0	0	0	0	3	2	3	0	1	0	2	9	0	0	0	0	0	0	0	1	0	0	1	0
J11	0	0	0	0	0	0	0	0	2	0	0	0	0	1	0	0	0	0	0	34	2	0	0	2	0	0	0	0	0	0	0	0	0	1	0	16	0	0	0	0	0	0	1	0	2	0	1	0	0
J12	0	0	0	0	0	0	0	0	2	0	0	0	0	1	0	0	0	0	0	3	1	0	0	0	0	0	0	0	0	0	4	0	0	2	0	5	1	0	0	0	0	0	0	0	1	0	0	0	0
J13	1	0	0	1	0	0	0	0	1	1	0	0	0	5	0	0	0	0	0	14	4	0	0	0	0	0	0	0	0	0	2	0	0	0	0	4	4	0	0	0	0	0	0	0	0	0	0	0	0
J14	0	0	0	0	0	0	0	0	1	0	0	0	0	1	0	0	0	0	0	12	0	0	0	0	0	0	0	0	0	0	0	0	0	3	0	45	0	0	0	0	0	0	0	0	0	0	0	0	0
J15	0	0	0	0	0	0	0	0	0	0	0	0	45	0	0	0	0	0	0	0	0	0	0	0	0	0	112	0	0	0	0	0	0	304	0	0	0	0	0	0	0	0	0	0	0	0	0	0	0
J16	0	0	0	4	0	0	0	0	5	0	0	0	0	0	0	0	0	0	0	4	0	0	0	0	0	0	0	0	0	0	53	0	0	2	0	1	0	1	0	0	0	0	0	0	0	0	0	0	0
J17	0	0	0	2	0	0	0	0	0	0	0	0	0	2	0	0	0	0	0	0	1	1	0	0	0	0	0	0	0	0	4	0	0	5	0	0	6	0	0	0	0	0	0	0	0	0	0	0	0
J18	0	0	0	0	0	0	0	0	0	0	0	0	224	0	0	0	0	0	0	0	0	0	0	0	0	0	28	0	0	0	0	0	0	382	0	1	0	0	0	0	0	0	0	0	0	0	0	0	0
J19	0	0	0	2	0	0	0	0	3	0	0	0	0	0	0	0	0	0	0	1	1	0	0	0	0	0	1	0	0	0	95	0	0	1	0	1	0	0	0	0	0	0	0	0	0	0	0	0	0
J20	0	12	0	16	0	0	0	0	6	0	1	1	0	1	1	0	0	0	0	27	0	0	0	0	0	0	0	0	0	0	16	0	0	2	0	0	1	0	0	0	0	0	0	0	0	0	0	0	0
J21	9	21	0	1	0	0	0	0	0	0	0	0	0	0	1	0	0	0	0	2	0	0	0	0	0	0	0	0	0	0	1	0	0	0	0	4	0	0	0	0	0	0	0	0	0	0	0	0	0
J22	0	1	0	5	0	0	0	0	6	0	0	0	0	0	0	0	0	0	0	26	2	0	2	0	0	0	0	0	0	0	0	0	0	2	0	9	0	0	0	0	0	0	0	0	0	0	1	0	0
J23	2	1	0	1	0	0	0	0	0	0	0	0	0	1	0	0	0	0	0	5	0	0	0	0	0	0	0	0	0	0	2	2	0	3	0	19	0	0	0	0	0	0	0	0	0	0	0	0	0
J24	0	0	0	1	0	0	0	0	0	0	0	0	39	0	0	0	0	0	0	0	0	2	0	0	0	0	2	0	0	0	1	0	0	860	0	11	0	0	0	0	0	0	0	0	0	0	0	0	0
J25	0	0	0	0	0	0	0	0	0	0	0	0	50	0	0	0	0	0	0	0	0	0	0	0	0	0	0	0	0	0	2	0	0	465	0	60	0	0	0	0	0	0	0	0	0	0	0	0	0
J26	0	1	0	2	0	0	0	0	4	0	0	0	0	2	0	0	0	0	0	4	0	0	0	0	0	0	0	0	0	0	55	4	0	2	0	0	0	0	0	0	0	0	0	0	1	0	0	0	0
J27	1	0	0	7	0	0	0	0	0	0	0	0	0	1	0	0	0	0	0	27	0	0	0	0	0	0	0	0	0	0	8	1	0	1	0	0	0	0	0	0	0	0	0	0	0	0	0	0	0
J28	0	0	0	6	0	0	0	0	10	0	0	0	0	2	0	0	0	0	0	13	0	0	0	0	0	0	0	0	0	0	11	0	0	0	0	1	0	0	0	0	0	0	0	0	0	0	0	0	0
J29	0	0	0	1	0	0	0	0	0	0	0	0	0	0	0	0	0	0	0	2	0	0	0	0	0	0	0	0	0	0	4	0	0	26	0	5	0	0	0	0	0	0	0	0	0	0	0	0	0
J30	0	0	0	7	0	0	0	0	7	0	0	0	0	0	0	0	0	0	0	0	0	1	0	0	0	8	1	0	0	0	39	0	0	0	0	0	0	2	0	0	0	0	0	0	1	0	0	0	0
J31	0	0	0	7	0	0	0	0	0	0	0	0	0	0	0	1	0	0	0	1	1	0	0	0	0	10	1	0	0	0	39	0	0	1	0	1	0	0	0	0	0	0	0	0	0	0	0	0	0
J32	0	2	0	0	0	0	0	0	1	1	0	0	0	0	0	0	0	1	0	27	0	1	0	0	0	0	0	0	0	0	1	0	0	12	0	5	0	0	0	0	0	0	0	0	0	0	0	0	0
J33	0	0	0	11	0	0	0	0	0	1	0	0	0	4	0	0	0	0	0	26	1	1	0	1	0	0	0	0	0	0	5	0	0	0	0	1	0	0	0	0	0	0	0	0	0	0	0	0	0
J34	0	0	0	0	0	0	0	0	0	2	0	1	1	1	0	0	0	0	0	13	0	1	0	0	0	0	0	0	0	0	0	1	0	323	0	31	0	0	0	0	0	0	0	0	2	0	1	0	0
[truncated: 77 more columns]

## Sheet: species list
	Sep.2011	Feb.2012	May.2012	Jul.2012
Mollusca
Abra sp1	1	0	0	1
Anomalocardia brasiliana	91	91	74	94
Bulla striata	0	5	0	0
Cerithium atratum	85	14	43	41
Chione cancellata	2	1	2	0
Chione subrostrata	0	1	0	0
Clyclinella tenuis	5	0	0	0
Corbula caribaea	13	5	0	4
Corbula sp1	9	6	2	7
Diplodonta patagonica	0	1	0	0
Diplodonta punctata	1	0	1	5
Donax gemmula	1	0	0	0
Ervilia nitens	3	0	0	0
Eurytellina lineata	50	15	6	20
Eurytellina sp1	2	0	0	1
Eurytellina sp2	1	0	0	1
Gouldia cerina	2	0	0	0
Iphigenia brasiliana	0	0	0	1
Macoma sp1	7	2	2	1
Nassarius vibex	4	5	1	0
Neritina virginea	11	5	14	14
Nucula semiornata	2	4	2	1
Olivella minuta	176	34	99	103
Periploma ovata	0	3	0	0
Phacoides pectinata	1	0	1	1
Pitar fulminatus	0	1	0	0
Protothaca pectorina	0	0	1	0
Semele sp1	0	0	2	0
Solen tehuelchus	0	1	0	0
Sphenia antillensis	0	1	0	0
Strigilla pisiformis	3	1	3	1
Tagelus divisus	4	2	1	0
Tagelus plebeius	1	3	0	1
Tivela mactroides	0	0	0	1
Polychaeta
Ancistrosyllis jonesi	0	0	0	2
Aricidea (Allia) albatrossae	0	1	0	0
Aricidea (Aricidea) fragilis	16	3	6	6
Aricidea cf wassi	0	0	0	18
Armandia agilis	7	0	5	14
Armandia hossfeldi	182	20	144	686
Armandia polyophtalama	6	0	0	0
Bocardiella ligerica	0	2	0	0
Boccardia polybranchia	2	1	0	0
Capitella capitata	364	1670	2136	2460
Capitella sp1	0	39	2	0
Cirriformia filigera	6	32	0	10
Cirriformia punctata	2	0	0	0
Cirriformia tentaculata	26	4	0	0
Clymenella dalesi	2	2	0	1
Diopatra aciculata	7	6	2	0
Diopatra dexiognatha	1	0	0	0
Dispio remanei	0	1	2	0
Dispio uncinata	1	0	0	1
Dorvillea sp1	2	1	0	0
Eteone alba	2	0	0	0
Glycinde multidens	46	25	18	36
Goniada litorea	3	6	2	3
Haploscoloplos sp1	215	6	5	33
Hemipodia simplex	0	1	1	1
Hermundura tricuspis	47	53	34	54
Heteromastus filiformis	69	99	145	406
Isolda pulchella	199	114	36	27
Laeonereis culveri	391	128	51	392
Lioimia medusa	0	1	0	0
Magelona californica	2	0	0	0
Magelona nonatoi	1	0	0	0
Magelona papilicornis	2	4	14	33
Magelona variolamellata	1	0	1	1
Marphysa sebastiana	52	36	36	32
Mediomastus californiensis	136	51	59	39
Mooreonuphis lineata	0	2	0	2
Naineris setosa	14	71	4	10
Nematonereis hebes	0	3	0	3
Nicolea uspiana	0	0	0	1
Notomastus hemipodus	3	3	6	4
Notomastus lobatus	1	1	0	0
Onuphis eremita oculata	0	1	0	0
Owenia brasiliensis	0	0	1	0
Owenia fusiformis	3	2	1	3
Paraprionospio pinnata	1	0	0	0
Phyllodoce mucosa	5	3	0	0
Poecilochaetus australis	1	1	4	1
Poecilochaetus perequensis	0	0	1	2
Poecilochaetus sp1	0	5	0	0
Polydora nuchalis	2	38	0	1
Polydora sp1	0	3	0	0
Polydora sp2	0	1	0	0
Polydora websteri	4	4	0	0
Prionospio steenstrupi	0	0	5	19
Protoaricia sp1	38	55	18	2
Scolelepis sp1	0	122	0	0
Scolelepis squamata	55	1	48	148
Scolelepis texana	0	0	1	0
Scoletoma tetraura	3	13	5	0
Scoloplos (leodamas) sp1	359	201	111	278
Scyphoproctus sp1	13	38	0	0
Sigambra grubii	6	1	3	10
Sigambra tentaculata	2	0	1	1
Sternaspis capilata	0	0	35	3
Syllis sp1	113	126	29	14
Terebellides anguicomus	1	5	1	1
Crustacea
Alpheus nittingi	0	1	0	0
Amphipoda sp1	0	1	0	0
Callinectes danae	4	1	1	1
Caridae sp1	5	0	0	0
Clibanarius antillensis	0	1	0	4
Clibanarius vittatus	0	0	1	0
Dendobranchiata	0	0	0	1
Monokalliapseudes schubartii	6583	9988	541	1647
Ocypodidae	1	0	0	0
Ogyrides alphaerostris	1	0	0	0
Pagurus criniticornis	4	4	4	8
Panopeus occidentalis	1	2	1	0
Pinnixa chaetopterana	0	2	0	1
Processa bermudensis	1	0	2	0
Uca leptodactyla	1	0	0	0
Upogebia brasiliensis	0	0	0	1
Upogebia paraffins	0	1	0	0
Upogebia vasquezi	0	0	1	0
Other taxa
Ophiuroidea sp1	10	0	5	0
Cephalochordata sp1	0	0	19	2
Edwardisia sp1	10	0	0	0
Sipuncula sp1	25	0	12	1
Oligochaeta	0	20	11	0
Holothuroidea sp1	4	0	2	0
Nemertinea sp1	3	0	1	0

## Sheet: waves
year	month	day	hour	height	period	direction	power
2011	9	1	0	2.6	8.6	197.36	564080
2011	9	1	3	2.58	8.83	189.01	570290
2011	9	1	6	2.51	8.92	186.91	545265
2011	9	1	9	2.44	8.97	186.52	518165
2011	9	1	12	2.38	9	186.99	494643
2011	9	1	15	2.33	9.06	187.92	477239
2011	9	1	18	2.32	9.16	189.23	478373
2011	9	1	21	2.39	9.37	190.53	519315
2011	9	2	0	2.57	11.28	185.79	722888
2011	9	2	3	2.85	11.87	182.76	935483
2011	9	2	6	3.06	12.28	184.84	1.11567e+06
2011	9	2	9	3.14	11.66	185.83	1.11546e+06
2011	9	2	12	3.13	11.44	189.63	1.08745e+06
2011	9	2	15	3.1	11.15	189.62	1.03967e+06
2011	9	2	18	3.02	10.93	189.71	967230
2011	9	2	21	2.89	10.79	189.73	874405
2011	9	3	0	2.75	10.64	189.67	780733
2011	9	3	3	2.61	10.39	189.35	686740
2011	9	3	6	2.53	10.18	188.85	632243
2011	9	3	9	2.49	10.06	188.04	605191
2011	9	3	12	2.49	10.01	186.76	602183
2011	9	3	15	2.49	10.01	184.83	602183
2011	9	3	18	2.49	10.03	182.43	603386
2011	9	3	21	2.51	10.06	180.01	614952
2011	9	4	0	2.51	10.08	177.84	616174
2011	9	4	3	2.5	10.1	176.14	612487
2011	9	4	6	2.44	10.13	174.82	585174
2011	9	4	9	2.35	10.19	173.5	546016
2011	9	4	12	2.28	10.3	171.81	519520
2011	9	4	15	2.24	10.45	169.54	508754
2011	9	4	18	2.2	10.61	161.05	498260
2011	9	4	21	2.19	11.06	158.38	514682
2011	9	5	0	2.2	11.62	150.01	545691
2011	9	5	3	2.2	11.66	149.22	547570
2011	9	5	6	2.19	11.66	148.63	542603
2011	9	5	9	2.15	11.7	148.06	524757
2011	9	5	12	2.1	11.83	147.49	506196
2011	9	5	15	2.1	12.19	146.83	521600
2011	9	5	18	2.16	13.15	143.48	595290
2011	9	5	21	2.25	13.65	143.36	670491
2011	9	6	0	2.3	13.62	143.27	699082
2011	9	6	3	2.31	13.41	143.09	694302
2011	9	6	6	2.25	13.27	142.89	651826
2011	9	6	9	2.18	13.15	142.68	606365
2011	9	6	12	2.19	13.02	142.65	605891
2011	9	6	15	2.23	12.77	142.55	616164
2011	9	6	18	2.26	12.27	143.09	608075
2011	9	6	21	2.24	12.08	142.88	588110
2011	9	7	0	2.16	11.98	142.78	542325
2011	9	7	3	2.06	11.89	142.61	489567
2011	9	7	6	1.96	11.78	142.32	439089
2011	9	7	9	1.88	11.62	141.67	398490
2011	9	7	12	1.82	11.46	141.87	368318
2011	9	7	15	1.81	11.48	141.33	364917
2011	9	7	18	1.85	11.96	138.44	397164
2011	9	7	21	1.92	12.23	137.32	437446
2011	9	8	0	1.97	12.24	136.37	460903
2011	9	8	3	1.98	12.21	135.71	464453
2011	9	8	6	1.98	12.19	135.88	463692
2011	9	8	9	1.96	12.14	136.69	452508
2011	9	8	12	1.93	12.08	137.57	436593
2011	9	8	15	1.93	12.11	139.16	437678
2011	9	8	18	2.01	12.28	143.47	481378
2011	9	8	21	2.15	12.41	150.71	556601
2011	9	9	0	2.24	12.34	156.8	600768
2011	9	9	3	2.26	12.22	160.35	605597
2011	9	9	6	2.2	12.09	161.87	567763
2011	9	9	9	2.09	11.96	162.13	506896
2011	9	9	12	1.99	11.8	161.35	453402
2011	9	9	15	1.9	11.68	159.61	409115
2011	9	9	18	1.81	11.56	157.64	367460
2011	9	9	21	1.76	11.2	164.9	336619
2011	9	10	0	1.72	10.78	163.61	309436
2011	9	10	3	1.64	10.51	161.82	274275
2011	9	10	6	1.54	10.42	153.65	239775
2011	9	10	9	1.45	10.44	156.83	212977
2011	9	10	12	1.4	10.41	159.16	197971
2011	9	10	15	1.44	10.13	161.18	203812
2011	9	10	18	1.57	9.88	163.81	236294
2011	9	10	21	1.67	9.79	167.4	264918
2011	9	11	0	1.65	7.02	188.52	185439
2011	9	11	3	1.56	9.71	174.17	229279
2011	9	11	6	1.46	9.28	165.14	191933
2011	9	11	9	1.38	9.02	169.07	166671
2011	9	11	12	1.29	8.93	171.13	144187
2011	9	11	15	1.21	8.86	171.89	125864
2011	9	11	18	1.14	8.77	171.79	110587
2011	9	11	21	1.07	8.2	161.08	91091.3
2011	9	12	0	1.01	7.75	142.31	76707.9
2011	9	12	3	0.97	7.61	138.62	69474.2
2011	9	12	6	1	7.44	135.42	72188.6
2011	9	12	9	1.14	6.95	151.43	87637.5
2011	9	12	12	1.47	7.43	178.26	155783
2011	9	12	15	1.83	7.98	185.17	259299
2011	9	12	18	2	8.34	187.25	323684
2011	9	12	21	2	8.49	187.81	329506
2011	9	13	0	1.93	8.75	190.2	316241
2011	9	13	3	1.86	9.68	192.29	324935
2011	9	13	6	1.8	9.83	193.59	309025
2011	9	13	9	1.72	9.82	193.55	281880
2011	9	13	12	1.64	9.85	193.42	257051
2011	9	13	15	1.56	10.06	193.26	237543
2011	9	13	18	1.49	10.17	193.07	219073
2011	9	13	21	1.4	10.09	192.82	191886
2011	9	14	0	1.31	9.97	192.59	166010
2011	9	14	3	1.22	9.85	192.47	142250
2011	9	14	6	1.15	9.67	192.43	124085
2011	9	14	9	1.1	9.41	189	110477
2011	9	14	12	1.05	9.26	187.41	99057
2011	9	14	15	1.02	9.26	184.49	93477.5
2011	9	14	18	1.07	9.54	190.69	105977
2011	9	14	21	1.25	9.85	189.74	149332
2011	9	15	0	1.5	10.6	182.97	231411
2011	9	15	3	1.77	11.1	182.53	337416
2011	9	15	6	1.98	11.57	179.3	440108
2011	9	15	9	2.16	11.6	179.93	525123
2011	9	15	12	2.29	11.56	180.95	588199
2011	9	15	15	2.34	10.29	183.88	546692
2011	9	15	18	2.32	10.27	183.83	536342
2011	9	15	21	2.31	10.36	183.7	536388
2011	9	16	0	2.34	10.36	183.63	550411
2011	9	16	3	2.39	10.22	183.71	566425
2011	9	16	6	2.41	10.03	183.92	565237
2011	9	16	9	2.38	9.9	183.95	544107
2011	9	16	12	2.29	9.75	183.69	496102
2011	9	16	15	2.17	9.61	183.09	439075
2011	9	16	18	2.08	9.33	168.99	391655
2011	9	16	21	2.06	6.19	90.18	254871
2011	9	17	0	2.04	12.42	170.69	501508
2011	9	17	3	2.06	12.14	168.47	499860
2011	9	17	6	2.19	6.16	85.87	286658
2011	9	17	9	2.27	6.29	82.9	314484
2011	9	17	12	2.33	12.98	161.82	683726
2011	9	17	15	2.31	12.75	161.88	660130
2011	9	17	18	2.14	12.2	165.62	542104
2011	9	17	21	2.08	11.95	165.27	501638
2011	9	18	0	2.24	11.72	163.44	570583
2011	9	18	3	2.42	6.72	90.87	381852
2011	9	18	6	2.51	6.98	88.02	426676
2011	9	18	9	2.54	7.2	90.68	450708
2011	9	18	12	2.49	7.47	90.44	449381
2011	9	18	15	2.39	7.52	92.25	416782
2011	9	18	18	2.24	7.52	94.54	366108
2011	9	18	21	2.14	7.5	95.67	333261
2011	9	19	0	2.05	7.47	96.82	304596
2011	9	19	3	2.06	7.47	96.61	307575
2011	9	19	6	2.17	7.6	95.6	347239
2011	9	19	9	2.27	7.75	94.75	387480
2011	9	19	12	2.33	7.79	94.07	410341
2011	9	19	15	2.35	7.95	105.76	425989
2011	9	19	18	2.32	11.65	141.77	608411
2011	9	19	21	2.28	11.66	141.58	588117
2011	9	20	0	2.24	11.67	141.26	568149
2011	9	20	3	2.28	11.62	140.94	586100
2011	9	20	6	2.34	11.22	140.66	596101
2011	9	20	9	2.35	10.95	140.18	586740
2011	9	20	12	2.27	10.83	139.99	541472
2011	9	20	15	2.15	10.75	139.98	482149
2011	9	20	18	2.02	10.68	139.85	422834
2011	9	20	21	1.92	10.59	139.34	378786
2011	9	21	0	1.84	10.06	133.73	330468
2011	9	21	3	1.76	9.76	133.67	293340
2011	9	21	6	1.71	9.6	133.5	272370
2011	9	21	9	1.7	9.44	121.29	264707
2011	9	21	12	1.73	9.57	131.71	277907
2011	9	21	15	1.75	9.96	130.41	295959
2011	9	21	18	1.75	10.02	129.32	297741
2011	9	21	21	1.78	10	128.61	307422
2011	9	22	0	1.87	9.88	128.58	335224
2011	9	22	3	1.94	9.55	129.59	348741
2011	9	22	6	1.92	9.12	140.84	326207
2011	9	22	9	1.87	9.08	144.35	308081
2011	9	22	12	1.81	9.05	146.68	287674
2011	9	22	15	1.75	8.99	148.94	267135
2011	9	22	18	1.71	8.93	151.58	253361
2011	9	22	21	1.67	8.9	153.64	240834
2011	9	23	0	1.61	8.86	155.17	222834
2011	9	23	3	1.55	8.74	154.91	203737
2011	9	23	6	1.5	8.56	161.59	186875
2011	9	23	9	1.45	8.42	159.16	171769
2011	9	23	12	1.38	8.34	155.41	154106
2011	9	23	15	1.3	8.34	150.27	136757
2011	9	23	18	1.22	8.68	128.87	125353
2011	9	23	21	1.15	8.79	126.41	112792
2011	9	24	0	1.1	8.8	123.75	103315
2011	9	24	3	1.06	8.79	120.85	95828.8
2011	9	24	6	1.09	8.72	118.83	100523
2011	9	24	9	1.15	7.49	118.8	96111
2011	9	24	12	1.19	7.64	105.31	104974
2011	9	24	15	1.25	7.93	103.62	120223
2011	9	24	18	1.37	8.04	101.35	146417
2011	9	24	21	1.56	12	178.99	283352
2011	9	25	0	1.88	11.82	177.3	405349
2011	9	25	3	2.28	11.73	176.02	591648
2011	9	25	6	2.58	11.55	175.51	745962
2011	9	25	9	2.7	11.03	178.95	780187
2011	9	25	12	2.74	10.84	179.86	789634
2011	9	25	15	2.78	10.72	180.38	803859
2011	9	25	18	2.78	10.59	180.5	794111
2011	9	25	21	2.73	10.25	176.56	741216
2011	9	26	0	2.64	9.62	176.99	650547
2011	9	26	3	2.52	9.54	177.14	587821
2011	9	26	6	2.42	9.71	176.74	551754
2011	9	26	9	2.34	10.06	175.73	534472
2011	9	26	12	2.3	10.64	178.9	546126
2011	9	26	15	2.29	10.75	178.52	546984
2011	9	26	18	2.25	10.71	178.13	526078
2011	9	26	21	2.22	10.6	177.51	506883
2011	9	27	0	2.19	10.35	167.63	481642
2011	9	27	3	2.14	14.13	154.24	627864
2011	9	27	6	2.1	14.2	154.23	607607
2011	9	27	9	2.07	14.19	153.68	589955
2011	9	27	12	2.03	14.16	153.76	566175
2011	9	27	15	1.97	14.1	153.45	530942
2011	9	27	18	1.88	7.42	118.67	254457
2011	9	27	21	1.78	13.14	156.78	403953
2011	9	28	0	1.69	13.01	156.24	360534
2011	9	28	3	1.6	12.86	155.53	319431
2011	9	28	6	1.52	12.32	158.73	276181
2011	9	28	9	1.46	12.06	157.82	249430
2011	9	28	12	1.4	11.95	157.45	227258
2011	9	28	15	1.35	11.86	157	209724
2011	9	28	18	1.3	11.71	156.77	192017
2011	9	28	21	1.25	11.37	156.94	172376
2011	9	29	0	1.2	11.24	156.81	157045
2011	9	29	3	1.15	11.23	156.57	144102
2011	9	29	6	1.11	11.26	156.3	134611
2011	9	29	9	1.07	11.23	155.85	124751
2011	9	29	12	1.04	11.13	155.34	116804
2011	9	29	15	1.03	11.02	154.77	113436
2011	9	29	18	1.01	10.94	154.33	108282
2011	9	29	21	1.06	10.89	153.78	118723
2011	9	30	0	1.14	10.85	152.99	136815
2011	9	30	3	1.22	10.8	151.58	155969
2011	9	30	6	1.26	6.12	96.5	94273.2
2011	9	30	9	1.32	6.46	90.1	109213
2011	9	30	12	1.36	6.79	89.25	121855
2011	9	30	15	1.33	6.92	88.71	118769
2011	9	30	18	1.26	7	89.05	107829
2011	9	30	21	1.2	7.2	93.02	100598
2011	10	1	0	1.17	7.3	92.56	96959.4
2011	10	1	3	1.14	7.36	91.91	92807.5
2011	10	1	6	1.13	7.39	91.18	91558.1
2011	10	1	9	1.13	7.42	90.3	91929.8
2011	10	1	12	1.14	7.46	89.27	94068.5
2011	10	1	15	1.16	7.55	88.15	98573.1
2011	10	1	18	1.18	7.73	87.46	104433
2011	10	1	21	1.19	7.89	95.62	108409
2011	10	2	0	1.17	7.96	94.93	105726
2011	10	2	3	1.18	8	93.75	108081
2011	10	2	6	1.22	8.05	92.3	116255
2011	10	2	9	1.32	12.51	178.4	211495
2011	10	2	12	1.45	12.16	180.34	248065
2011	10	2	15	1.55	11.86	179.77	276467
2011	10	2	18	1.58	11.58	178.5	280491
2011	10	2	21	1.56	11.04	185.97	260684
2011	10	3	0	1.52	10.65	185.52	238744
2011	10	3	3	1.47	10.54	184.38	220989
2011	10	3	6	1.42	10.56	183.11	206603
2011	10	3	9	1.37	10.52	181.8	191581
2011	10	3	12	1.33	10.24	188.64	175751
2011	10	3	15	1.3	10.08	188.16	165289
2011	10	3	18	1.27	9.99	187.41	156339
2011	10	3	21	1.25	9.93	186.71	150544
2011	10	4	0	1.23	9.89	185.92	145178
2011	10	4	3	1.24	9.84	184.94	146803
2011	10	4	6	1.32	9.75	184.02	164834
2011	10	4	9	1.63	9.06	186.85	233560
2011	10	4	12	1.99	8.45	186.52	324682
2011	10	4	15	2.21	8.43	186.13	399492
2011	10	4	18	2.36	8.75	183.15	472855
2011	10	4	21	2.51	10.4	182.34	635735
2011	10	5	0	2.57	10.68	180.8	684436
2011	10	5	3	2.49	10.5	180.58	631660
2011	10	5	6	2.38	10.37	185.05	569939
2011	10	5	9	2.35	10.36	184.57	555125
2011	10	5	12	2.28	10.44	183.37	526582
2011	10	5	15	2.2	10.55	178.44	495443
2011	10	5	18	2.18	10.71	177.07	493853
2011	10	5	21	2.2	11.08	174.96	520332
2011	10	6	0	2.17	11.41	172.33	521316
2011	10	6	3	2.1	11	169.89	470681
2011	10	6	6	2	10.73	168.06	416443
2011	10	6	9	1.91	10.49	166.69	371311
2011	10	6	12	1.8	10.25	170.88	322229
2011	10	6	15	1.67	10.04	169.82	271683
2011	10	6	18	1.53	9.9	169.14	224861
2011	10	6	21	1.39	9.77	168.48	183155
2011	10	7	0	1.25	9.56	167.64	144935
2011	10	7	3	1.14	9.31	162.07	117396
2011	10	7	6	1.05	9.18	160.58	98201.2
2011	10	7	9	0.98	9.1	158.98	84798.7
2011	10	7	12	0.94	9.05	156.71	77588.9
2011	10	7	15	0.92	9.02	153.02	74076
2011	10	7	18	0.93	8.98	148.26	75359.5
2011	10	7	21	0.96	8.95	142.94	80031.5
2011	10	8	0	0.99	8.92	138.31	84826.4
2011	10	8	3	1.05	8.91	135.21	95312.9
2011	10	8	6	1.09	8.91	131.83	102713
2011	10	8	9	1.14	8.98	128.17	113235
2011	10	8	12	1.2	9.5	123.15	132734
2011	10	8	15	1.27	10.31	124.94	161347
2011	10	8	18	1.3	10.06	122.32	164961
2011	10	8	21	1.36	9.94	120.96	178386
2011	10	9	0	1.39	9.87	118.03	185030
2011	10	9	3	1.51	9.81	113.25	217029
2011	10	9	6	1.65	6.2	87.03	163778
2011	10	9	9	1.76	7.03	86.5	211289
2011	10	9	12	1.86	7.6	87.9	255114
2011	10	9	15	1.93	7.98	94.48	288412
2011	10	9	18	1.94	8.4	96.7	306746
2011	10	9	21	1.9	8.71	102.78	305085
2011	10	10	0	1.83	8.68	101.53	282044
2011	10	10	3	1.77	8.42	95.28	255949
2011	10	10	6	1.69	8.23	94.01	228070
2011	10	10	9	1.63	8.09	92.97	208554
2011	10	10	12	1.58	8.03	92.45	194503
2011	10	10	15	1.59	8.13	92.5	199425
2011	10	10	18	1.63	8.51	93.02	219382
2011	10	10	21	1.68	8.7	98.89	238250
2011	10	11	0	1.71	8.74	98.74	247970
2011	10	11	3	1.69	8.78	98.71	243312
2011	10	11	6	1.67	8.84	98.66	239211
2011	10	11	9	1.7	8.89	98.12	249284
2011	10	11	12	1.76	8.94	97.14	268694
2011	10	11	15	1.81	8.99	96.25	285767
2011	10	11	18	1.81	8.98	95.55	285449
2011	10	11	21	1.77	8.91	95.11	270844
2011	10	12	0	1.71	8.81	94.96	249956
2011	10	12	3	1.63	8.69	94.99	224022
2011	10	12	6	1.55	8.57	91.41	199774
2011	10	12	9	1.51	8.47	91.95	187384
2011	10	12	12	1.5	8.46	94.78	184692
2011	10	12	15	1.51	8.48	100.26	187605
2011	10	12	18	1.5	8.43	106.64	184037
2011	10	12	21	1.48	8.32	111.35	176824
2011	10	13	0	1.46	8.21	113.49	169803
2011	10	13	3	1.42	8.14	113.16	159256
2011	10	13	6	1.41	8.14	111.27	157021
2011	10	13	9	1.41	8.2	108.76	158179
2011	10	13	12	1.41	8.3	106.29	160108
2011	10	13	15	1.41	8.36	104.15	161265
2011	10	13	18	1.41	8.41	102.41	162229
2011	10	13	21	1.43	8.45	101	167658
2011	10	14	0	1.42	8.47	99.81	165713
2011	10	14	3	1.44	8.44	98.57	169810
2011	10	14	6	1.46	8.35	97.32	172698
2011	10	14	9	1.49	8.26	96.06	177930
2011	10	14	12	1.51	8.18	94.94	180968
2011	10	14	15	1.5	8.14	94.14	177706
2011	10	14	18	1.5	8.18	93.13	178579
2011	10	14	21	1.5	8.29	91.9	180981
2011	10	15	0	1.48	8.4	90.77	178525
2011	10	15	3	1.43	8.45	89.92	167658
2011	10	15	6	1.35	8.48	89.34	149954
2011	10	15	9	1.27	8.49	88.99	132865
2011	10	15	12	1.21	8.49	88.78	120607
2011	10	15	15	1.19	8.49	88.58	116653
2011	10	15	18	1.22	8.52	88.25	123042
2011	10	15	21	1.31	8.57	88.44	142698
2011	10	16	0	1.41	8.5	89.6	163966
2011	10	16	3	1.47	8.36	91.18	175282
2011	10	16	6	1.45	8.23	92.47	167893
2011	10	16	9	1.4	8.14	93.88	154802
2011	10	16	12	1.34	8.08	96.22	140772
2011	10	16	15	1.27	8.02	99.97	125510
2011	10	16	18	1.2	7.96	104.22	111217
2011	10	16	21	1.15	7.88	107.62	101115
2011	10	17	0	1.1	7.81	121.59	91692.1
2011	10	17	3	1.06	7.79	123.07	84926.8
2011	10	17	6	1.03	7.82	122.89	80496.5
2011	10	17	9	1.02	7.87	121	79445.7
2011	10	17	12	1.06	7.89	121.12	86017
2011	10	17	15	1.16	7.89	126.1	103012
2011	10	17	18	1.25	7.92	133.64	120072
2011	10	17	21	1.3	7.94	142.41	130198
2011	10	18	0	1.32	7.9	148.91	133558
2011	10	18	3	1.3	7.09	113.5	116260
2011	10	18	6	1.28	7.05	114.46	112074
2011	10	18	9	1.27	7.11	116.32	111269
2011	10	18	12	1.29	7.19	124.72	116092
2011	10	18	15	1.33	7.22	120.78	123918
2011	10	18	18	1.38	7.25	118.59	133965
2011	10	18	21	1.42	7.3	118.87	142822
2011	10	19	0	1.44	10.19	175.68	205019
2011	10	19	3	1.45	9.85	175.89	200941
2011	10	19	6	1.46	9.6	174.87	198551
2011	10	19	9	1.48	9.29	173.9	197440
2011	10	19	12	1.52	9.08	173.09	203549
2011	10	19	15	1.58	8.77	171.54	212427
2011	10	19	18	1.6	7.11	136.49	176606
2011	10	19	21	1.62	7.32	144.82	186396
2011	10	20	0	1.66	8.99	164.79	240365
2011	10	20	3	1.74	9.23	163.28	271141
2011	10	20	6	1.84	9.43	162.59	309773
2011	10	20	9	1.91	9.49	162.12	335914
2011	10	20	12	1.95	9.6	156.75	354190
2011	10	20	15	1.97	9.82	156.21	369777
2011	10	20	18	1.97	10.13	155.59	381450
2011	10	20	21	1.98	10.36	154.82	394081
2011	10	21	0	1.97	10.38	153.88	390864
2011	10	21	3	1.98	10.37	152.83	394462
2011	10	21	6	1.99	10.37	151.72	398456
2011	10	21	9	2.01	10.36	150.61	406113
2011	10	21	12	2.04	10.34	149.65	417519
2011	10	21	15	2.05	10.37	148.88	422846
2011	10	21	18	2.03	10.4	148.18	415835
2011	10	21	21	2.04	10.34	147.41	417519
2011	10	22	0	2.08	10.23	146.7	429435
2011	10	22	3	2.17	10.15	146.03	463747
2011	10	22	6	2.31	10.1	145.18	522927
2011	10	22	9	2.44	10.02	143.97	578819
2011	10	22	12	2.51	9.95	142.43	608228
2011	10	22	15	2.51	9.93	140.87	607005
2011	10	22	18	2.48	10.05	139.36	599743
2011	10	22	21	2.48	10.49	135.77	626000
2011	10	23	0	2.5	10.66	134.99	646447
2011	10	23	3	2.5	10.64	134.35	645234
2011	10	23	6	2.47	10.64	133.72	629841
2011	10	23	9	2.39	10.61	133.17	588040
2011	10	23	12	2.28	10.64	132.73	536669
2011	10	23	15	2.17	10.63	132.35	485678
2011	10	23	18	2.08	10.61	132	445387
2011	10	23	21	2.03	10.54	131.58	421433
2011	10	24	0	1.99	10.4	131.34	399609
2011	10	24	3	1.96	10.25	130.42	382060
2011	10	24	6	1.95	10.14	129.26	374113
2011	10	24	9	2	9.72	127.75	377244
2011	10	24	12	2.05	8.59	103.74	350265
2011	10	24	15	2.04	8.55	102.85	345241
2011	10	24	18	1.98	8.54	102.78	324851
2011	10	24	21	1.93	8.5	102.97	307206
2011	10	25	0	1.88	8.44	103.54	289437
2011	10	25	3	1.95	8.33	103.72	307333
2011	10	25	6	2.06	8.15	102.29	335573
2011	10	25	9	2.13	8.1	99.94	356566
2011	10	25	12	2.1	8.13	99.32	347876
2011	10	25	15	2	8.15	99.99	316310
2011	10	25	18	1.88	8.18	100.55	280520
2011	10	25	21	1.79	8.19	100.77	254616
2011	10	26	0	1.7	8.2	100.72	229936
2011	10	26	3	1.65	8.22	99.85	217138
2011	10	26	6	1.76	8.42	97.2	253066
2011	10	26	9	1.95	8.77	100.57	323567
2011	10	26	12	2.07	8.9	98.25	370021
2011	10	26	15	2.1	9.18	96.67	392805
2011	10	26	18	2.06	9.49	95.34	390747
2011	10	26	21	2.01	9.53	94.25	373577
2011	10	27	0	1.92	9.44	93.33	337653
2011	10	27	3	1.82	9.33	92.54	299861
2011	10	27	6	1.73	9.28	91.81	269486
2011	10	27	9	1.67	9.27	91.22	250847
2011	10	27	12	1.64	9.26	90.67	241654
2011	10	27	15	1.67	9.2	90.45	248952
2011	10	27	18	1.75	9.06	92.31	269215
2011	10	27	21	1.84	8.94	98.79	293676
2011	10	28	0	1.87	8.91	107.49	302313
2011	10	28	3	1.85	8.9	113.11	295549
2011	10	28	6	1.81	8.88	115.15	282271
2011	10	28	9	1.77	8.89	116.8	270236
2011	10	28	12	1.74	8.93	121.23	262329
2011	10	28	15	1.71	8.95	127.53	253928
2011	10	28	18	1.68	8.94	132.36	244823
2011	10	28	21	1.64	8.93	133.18	233042
2011	10	29	0	1.61	8.91	131.31	224091
2011	10	29	3	1.58	8.9	129.67	215576
2011	10	29	6	1.56	8.88	129.38	209680
2011	10	29	9	1.57	8.89	130.03	212616
2011	10	29	12	1.59	9	131.53	220766
2011	10	29	15	1.61	11.74	193.59	295267
2011	10	29	18	1.6	11.39	193.01	282917
2011	10	29	21	1.6	10.97	193.59	272485
2011	10	30	0	1.58	10.79	193.71	261355
2011	10	30	3	1.55	10.69	193.41	249193
2011	10	30	6	1.51	10.6	193.21	234507
2011	10	30	9	1.46	10.48	187.34	216752
2011	10	30	12	1.41	10.22	188.1	197144
2011	10	30	15	1.38	10.05	188.62	185703
2011	10	30	18	1.47	9.92	188.51	207990
2011	10	30	21	1.57	9.81	188.22	234619
2011	10	31	0	1.71	9.64	189.06	273505
2011	10	31	3	1.88	9.21	183.93	315843
2011	10	31	6	2.02	8.87	189.14	351174
2011	10	31	9	2.1	8.52	191.59	364564
2011	10	31	12	2.16	8.43	193.31	381620
2011	10	31	15	2.15	8.38	191.58	375852
2011	10	31	18	2.08	8.26	189.06	346739
2011	10	31	21	1.98	8.08	186.88	307353
2011	11	1	0	1.9	7.84	189.17	274612
2011	11	1	3	1.88	7.77	189.78	266460
2011	11	1	6	1.87	7.8	190.24	264651
2011	11	1	9	1.87	7.87	189.3	267026
2011	11	1	12	1.87	7.97	182.74	270419
2011	11	1	15	1.88	8.07	180.02	276748
2011	11	1	18	1.93	8.25	178.62	298170
2011	11	1	21	2.01	8.62	177.6	337905
2011	11	2	0	2.09	9.32	180.18	395006
2011	11	2	3	2.14	10	180.05	444348
2011	11	2	6	2.15	10.14	180.39	454790
2011	11	2	9	2.12	10.31	180.66	449600
2011	11	2	12	2.07	10.39	180.92	431968
2011	11	2	15	2.03	10.27	181.31	410637
2011	11	2	18	1.99	10.05	181.72	386160
2011	11	2	21	1.97	9.87	181.97	371659
2011	11	3	0	1.94	9.72	181.99	354948
2011	11	3	3	1.91	9.59	181.62	339454
2011	11	3	6	1.87	9.17	174.5	311134
2011	11	3	9	1.83	8.91	173.37	289518
2011	11	3	12	1.8	8.77	172.16	275702
2011	11	3	15	1.78	8.71	170.78	267765
2011	11	3	18	1.77	8.68	168.87	263853
2011	11	3	21	1.77	8.67	166.4	263549
2011	11	4	0	1.75	8.66	159.58	257329
2011	11	4	3	1.73	8.66	158.47	251481
2011	11	4	6	1.71	8.68	154.39	246268
2011	11	4	9	1.7	8.67	150.26	243115
2011	11	4	12	1.69	8.64	153.44	239432
2011	11	4	15	1.66	8.62	151.03	230472
2011	11	4	18	1.63	8.63	148.16	222475
2011	11	4	21	1.62	8.65	144.7	220263
2011	11	5	0	1.62	8.66	140.97	220518
2011	11	5	3	1.62	8.69	131.63	221282
2011	11	5	6	1.61	8.75	130	220067
2011	11	5	9	1.57	8.89	128.54	212616
2011	11	5	12	1.55	9.11	127.07	212362
2011	11	5	15	1.53	9.23	126.32	209643
2011	11	5	18	1.48	9.18	126.48	195102
2011	11	5	21	1.48	9.11	127.81	193614
2011	11	6	0	1.49	9.06	129.55	195162
2011	11	6	3	1.51	9.02	131.34	199552
2011	11	6	6	1.5	9	132.9	196481
2011	11	6	9	1.48	8.98	133.6	190851
2011	11	6	12	1.46	9.04	133.58	186969
2011	11	6	15	1.44	9.54	133.35	191942
2011	11	6	18	1.41	9.62	131.99	185570
2011	11	6	21	1.39	9.63	131.43	180531
2011	11	7	0	1.35	9.61	131.49	169936
2011	11	7	3	1.32	9.57	132	161791
2011	11	7	6	1.31	9.55	133.17	159016
2011	11	7	9	1.32	9.33	133.08	157734
2011	11	7	12	1.34	9.15	133.55	159414
2011	11	7	15	1.34	9.01	133.67	156975
2011	11	7	18	1.31	8.91	133.5	148360
2011	11	7	21	1.27	8.83	132.84	138186
2011	11	8	0	1.21	8.73	131.46	124017
2011	11	8	3	1.16	8.58	132.36	112021
2011	11	8	6	1.11	8.51	131.98	101735
2011	11	8	9	1.07	8.51	131.29	94535
2011	11	8	12	1.03	8.56	130.49	88113.8
2011	11	8	15	0.99	8.6	129.89	81783.3
2011	11	8	18	0.96	8.59	129.44	76812.4
2011	11	8	21	0.94	8.53	129.24	73130.8
2011	11	9	0	0.9	8.45	129.23	66410.6
2011	11	9	3	0.86	8.39	129.38	60208
2011	11	9	6	0.84	8.39	129.95	57440.2
2011	11	9	9	0.83	8.45	135.02	56481.8
2011	11	9	12	0.85	8.45	144.35	59236.6
2011	11	9	15	0.88	8.37	153.52	62890.7
2011	11	9	18	0.93	8.26	159.3	69317.3
2011	11	9	21	0.97	8.16	160.85	74495.4
2011	11	10	0	1	8.03	158.89	77913.2
2011	11	10	3	1.04	7.83	159.06	82172
2011	11	10	6	1.08	7.61	156.12	86124.7
2011	11	10	9	1.1	7.4	148.8	86878.6
2011	11	10	12	1.16	6.8	108.53	88781.1
2011	11	10	15	1.19	6.69	101	91921.2
2011	11	10	18	1.16	6.66	98.7	86953.2
2011	11	10	21	1.12	6.65	98.87	80938.1
2011	11	11	0	1.08	6.71	100.41	75939.1
2011	11	11	3	1.05	8.17	132.42	87396.9
2011	11	11	6	1.03	8.14	130.98	83790.4
2011	11	11	9	1.03	8.1	128.73	83378.7
2011	11	11	12	1.07	8.01	125.67	88980.7
2011	11	11	15	1.15	7.89	121.71	101244
2011	11	11	18	1.23	7.84	106.54	115086
2011	11	11	21	1.26	7.91	116.58	121847
2011	11	12	0	1.25	7.99	115.75	121133
2011	11	12	3	1.22	8.03	114.63	115966
2011	11	12	6	1.2	8.08	112.68	112894
2011	11	12	9	1.23	8.15	110.5	119636
2011	11	12	12	1.27	8.32	109.02	130205
2011	11	12	15	1.32	8.61	108.34	145562
2011	11	12	18	1.36	8.87	113.27	159183
2011	11	12	21	1.44	9	114.62	181077
2011	11	13	0	1.55	9.02	115.96	210264
2011	11	13	3	1.65	8.96	116.22	236685
2011	11	13	6	1.73	8.83	116.54	256418
2011	11	13	9	1.78	8.63	111.06	265306
2011	11	13	12	1.8	8.57	110.91	269415
2011	11	13	15	1.8	8.61	111.49	270672
2011	11	13	18	1.81	8.86	125.01	281635
2011	11	13	21	1.84	9.35	125.34	307145
2011	11	14	0	1.87	9.51	123.26	322671
2011	11	14	3	1.89	9.54	126.16	330649
2011	11	14	6	1.89	9.5	119.33	329263
2011	11	14	9	1.89	9.52	119.02	329956
2011	11	14	12	1.9	9.51	119.64	333107
2011	11	14	15	1.87	9.44	121.81	320295
2011	11	14	18	1.8	9.39	122.4	295193
2011	11	14	21	1.76	9.35	121.39	281017
2011	11	15	0	1.77	9.33	119.3	283611
2011	11	15	3	1.78	9.33	115.77	286825
2011	11	15	6	1.81	9.36	111.97	297528
2011	11	15	9	1.86	9.4	109.14	315536
2011	11	15	12	1.9	9.43	107.77	330304
2011	11	15	15	1.92	9.4	106.7	336222
2011	11	15	18	1.94	9.41	104.63	343628
2011	11	15	21	2.06	9.49	102.03	390747
2011	11	16	0	2.28	9.56	98.2	482195
2011	11	16	3	2.34	9.58	98.08	508971
2011	11	16	6	2.3	9.58	98.62	491719
2011	11	16	9	2.26	8.11	145.08	401914
2011	11	16	12	2.25	8.15	157.11	400330
2011	11	16	15	2.28	8.12	162.73	409564
2011	11	16	18	2.31	7.86	170.45	406951
2011	11	16	21	2.31	8.71	137.53	450960
2011	11	17	0	2.24	8.77	136.35	426964
2011	11	17	3	2.14	8.8	134.4	391026
2011	11	17	6	2.01	8.81	130.75	345353
2011	11	17	9	1.89	8.8	125.56	305001
2011	11	17	12	1.79	8.75	119.14	272026
2011	11	17	15	1.7	8.37	144.95	234703
2011	11	17	18	1.63	8.23	141.52	212163
2011	11	17	21	1.57	8.22	137.75	196592
2011	11	18	0	1.51	9.57	94.79	211720
2011	11	18	3	1.47	9.63	94.96	201909
2011	11	18	6	1.44	9.61	95.3	193350
2011	11	18	9	1.42	9.54	95.8	186647
2011	11	18	12	1.4	9.28	105.93	176482
2011	11	18	15	1.38	9.15	107.44	169073
2011	11	18	18	1.36	9.07	108.52	162772
2011	11	18	21	1.34	9.01	108.32	156975
2011	11	19	0	1.31	8.98	106.69	149525
2011	11	19	3	1.28	8.96	104.75	142437
2011	11	19	6	1.28	9.01	105.62	143232
2011	11	19	9	1.31	9.12	110.83	151856
2011	11	19	12	1.38	9.2	116.76	169997
2011	11	19	15	1.41	9.14	120.31	176311
2011	11	19	18	1.41	9.04	121.81	174382
2011	11	19	21	1.42	8.96	122.82	175299
2011	11	20	0	1.43	8.92	123.58	176983
2011	11	20	3	1.49	8.9	124.82	191716
2011	11	20	6	1.54	8.89	126.49	204569
2011	11	20	9	1.57	8.88	128.05	212377
2011	11	20	12	1.58	8.86	129.41	214607
2011	11	20	15	1.6	8.83	130.49	219329
2011	11	20	18	1.6	8.78	131.52	218087
2011	11	20	21	1.63	8.72	132.41	224795
2011	11	21	0	1.67	8.6	127.95	232716
2011	11	21	3	1.73	8.38	128.08	243350
2011	11	21	6	1.76	8.2	128.14	246453
2011	11	21	9	1.75	8.05	127.77	239204
2011	11	21	12	1.73	7.9	127.17	229411
2011	11	21	15	1.68	7.81	122.99	213877
2011	11	21	18	1.61	7.77	122.54	195420
2011	11	21	21	1.58	7.78	122.08	188447
2011	11	22	0	1.66	7.8	121.18	208548
2011	11	22	3	1.77	7.6	118.41	231023
2011	11	22	6	1.83	7.3	112.87	237203
2011	11	22	9	1.89	7.44	106.54	257865
2011	11	22	12	1.96	7.7	100.43	287011
2011	11	22	15	2	7.98	103.88	309712
2011	11	22	18	1.94	8.17	102.29	298347
2011	11	22	21	1.8	8.27	102.37	259984
2011	11	23	0	1.64	8.34	102.8	217645
2011	11	23	3	1.51	8.42	102.93	186278
2011	11	23	6	1.44	8.51	101.88	171218
2011	11	23	9	1.42	8.56	100.25	167473
2011	11	23	12	1.49	8.54	99.1	183961
2011	11	23	15	1.7	8.42	100.49	236105
2011	11	23	18	2.1	7.85	178.27	335895
2011	11	23	21	2.35	7.87	198	421702
2011	11	24	0	2.38	8.16	192.9	448476
2011	11	24	3	2.31	8.27	194.49	428179
2011	11	24	6	2.27	8.35	195.33	417478
2011	11	24	9	2.23	8.45	194.99	407720
2011	11	24	12	2.15	8.53	193.16	382579
2011	11	24	15	2.05	8.58	190.28	349857
2011	11	24	18	1.95	8.55	186.69	315450
2011	11	24	21	1.86	8.47	182.35	284318
2011	11	25	0	1.78	8.38	177.51	257620
2011	11	25	3	1.7	8.29	172.24	232460
2011	11	25	6	1.63	8.21	166.45	211648
2011	11	25	9	1.58	8.15	159.41	197409
2011	11	25	12	1.56	8.11	151.33	191499
2011	11	25	15	1.55	8.11	142.98	189051
2011	11	25	18	1.54	8.16	135.02	187770
2011	11	25	21	1.54	8.22	128.14	189151
2011	11	26	0	1.54	8.32	122	191452
2011	11	26	3	1.71	8.44	116.23	239458
2011	11	26	6	1.67	8.54	111.09	231093
2011	11	26	9	1.64	8.59	107.33	224169
2011	11	26	12	1.57	8.61	104.83	205920
2011	11	26	15	1.51	8.62	104.03	190703
2011	11	26	18	1.45	8.65	104.07	176461
2011	11	26	21	1.4	8.68	105.39	165071
2011	11	27	0	1.36	8.71	103.89	156312
2011	11	27	3	1.35	8.73	101.99	154375
2011	11	27	6	1.38	8.72	100.09	161128
2011	11	27	9	1.45	8.67	98.45	176869
2011	11	27	12	1.51	8.56	95.07	189375
2011	11	27	15	1.53	8.52	94.19	193517
2011	11	27	18	1.51	8.57	93.55	189596
2011	11	27	21	1.49	8.69	95.75	187192
2011	11	28	0	1.5	8.72	95.52	190368
2011	11	28	3	1.52	8.72	95.51	195479
2011	11	28	6	1.5	8.78	95.37	191678
2011	11	28	9	1.48	8.9	95.15	189151
2011	11	28	12	1.58	8.82	95.35	213638
2011	11	28	15	1.73	8.7	95.85	252643
2011	11	28	18	1.85	8.79	96.31	291896
2011	11	28	21	2	8.89	95.9	345030
2011	11	29	0	2.21	8.9	95.45	421765
2011	11	29	3	2.36	8.79	95.39	475016
2011	11	29	6	2.3	8.69	95.48	446037
2011	11	29	9	2.14	8.72	95.48	387471
2011	11	29	12	1.98	8.98	95.11	341588
2011	11	29	15	1.84	9.65	95.93	316999
2011	11	29	18	1.75	9.8	96.21	291204
2011	11	29	21	1.69	9.85	97.01	272964
2011	11	30	0	1.65	9.83	98.15	259667
2011	11	30	3	1.67	9.75	99.28	263835
2011	11	30	6	1.76	9.52	96.71	286126
2011	11	30	9	1.87	8.82	97.26	299259
2011	11	30	12	1.89	8.82	97.24	305695
2011	11	30	15	1.83	8.86	96.66	287893
2011	11	30	18	1.74	8.92	95.9	262035
2011	11	30	21	1.66	8.96	95.42	239563
2011	12	1	0	1.6	8.99	95.09	223303
2011	12	1	3	1.54	8.99	94.78	206870
2011	12	1	6	1.5	8.98	94.44	196044
2011	12	1	9	1.45	8.96	94.18	182785
2011	12	1	12	1.44	8.94	94.01	179870
2011	12	1	15	1.43	8.92	94.11	176983
2011	12	1	18	1.38	8.9	94.37	164454
2011	12	1	21	1.37	8.9	94.57	162079
2011	12	2	0	1.42	8.9	94.48	174125
2011	12	2	3	1.55	8.83	95.95	205835
2011	12	2	6	2.05	8.69	150.13	354342
2011	12	2	9	2.74	9.5	181.42	692023
2011	12	2	12	3.08	11.69	193.13	1.076e+06
2011	12	2	15	3.16	12.16	193.21	1.17816e+06
2011	12	2	18	3.12	12.25	193.53	1.15702e+06
2011	12	2	21	3.04	12.17	192.64	1.09127e+06
2011	12	3	0	2.94	12.08	190.95	1.01311e+06
2011	12	3	3	2.84	12.02	188.23	940669
2011	12	3	6	2.75	11.95	185.75	876857
2011	12	3	9	2.66	11.84	183.48	812850
2011	12	3	12	2.58	11.61	182.01	749837
2011	12	3	15	2.51	11.16	184.57	682193
2011	12	3	18	2.45	11	182.53	640649
2011	12	3	21	2.38	10.92	180.35	600167
2011	12	4	0	2.33	10.83	178.34	570474
2011	12	4	3	2.28	10.71	175.89	540200
2011	12	4	6	2.24	10.52	173.64	512162
2011	12	4	9	2.23	10.32	175.04	497949
2011	12	4	12	2.25	10.31	173.05	506430
2011	12	4	15	2.25	10.43	171	512324
2011	12	4	18	2.22	10.58	167.64	505926
2011	12	4	21	2.19	10.67	168.23	496533
2011	12	5	0	2.16	10.64	169.32	481665
2011	12	5	3	2.11	10.51	170.39	454008
2011	12	5	6	2.04	10.3	169.43	415904
2011	12	5	9	1.97	10.14	170.03	381826
2011	12	5	12	1.91	10.02	170.09	354675
2011	12	5	15	1.83	9.91	169.75	322011
2011	12	5	18	1.74	9.79	168.9	287592
2011	12	5	21	1.66	9.61	167.5	256942
2011	12	6	0	1.59	9.24	160.22	226653
2011	12	6	3	1.52	9.07	157.68	203325
2011	12	6	6	1.45	8.97	154.59	182989
2011	12	6	9	1.41	8.89	151.11	171489
2011	12	6	12	1.38	8.8	147.39	162606
2011	12	6	15	1.37	8.7	143.49	158437
2011	12	6	18	1.32	8.47	136.7	143195
2011	12	6	21	1.29	8.34	133.91	134661
2011	12	7	0	1.27	8.26	131.26	129266
2011	12	7	3	1.27	8.21	128.68	128483
2011	12	7	6	1.25	8.17	126.32	123862
2011	12	7	9	1.22	8.13	123.91	117410
2011	12	7	12	1.2	8.07	121.25	112754
2011	12	7	15	1.2	7.98	118.82	111496
2011	12	7	18	1.18	7.83	123.88	105784
2011	12	7	21	1.17	7.69	122.83	102139
2011	12	8	0	1.16	7.64	121.55	99748.2
2011	12	8	3	1.15	7.63	120.1	97907.5
2011	12	8	6	1.12	7.68	118.79	93474.4
2011	12	8	9	1.09	7.8	117.81	89917.3
2011	12	8	12	1.07	7.98	110.14	88647.4
2011	12	8	15	1.04	8.1	109.27	85005.5
2011	12	8	18	1.02	8.2	108.19	82777
2011	12	8	21	0.99	8.39	107.97	79786.2
2011	12	9	0	0.97	8.55	109.08	78055.8
2011	12	9	3	0.96	8.52	111.74	76186.4
2011	12	9	6	0.95	8.41	114.69	73644.2
2011	12	9	9	0.93	8.31	117.08	69736.9
2011	12	9	12	0.91	8.23	118.18	66126.9
2011	12	9	15	0.89	8.14	118.13	62560.5
2011	12	9	18	0.89	7.98	116.16	61330.8
2011	12	9	21	0.9	7.69	119.56	60437.6
2011	12	10	0	0.89	7.53	116.99	57872.3
2011	12	10	3	0.87	7.43	114.02	54566.1
2011	12	10	6	0.86	7.38	109.96	52960.1
2011	12	10	9	0.89	7.33	105.03	56335.2
2011	12	10	12	0.95	7.25	101.22	63486.4
2011	12	10	15	0.99	7.1	112.52	67518.7
2011	12	10	18	1.03	6.94	117.06	71438
2011	12	10	21	1.09	6.74	126.43	77697.7
2011	12	11	0	1.23	6.73	138.49	98791.8
2011	12	11	3	1.43	6.99	143.46	138690
2011	12	11	6	1.64	7.74	136.43	201987
2011	12	11	9	1.83	8.27	137.49	268722
2011	12	11	12	1.94	8.51	137.98	310763
2011	12	11	15	1.94	8.61	137.89	314414
2011	12	11	18	1.92	8.75	136.44	312972
2011	12	11	21	1.88	8.87	134.8	304183
2011	12	12	0	1.84	8.97	134.42	294662
2011	12	12	3	1.82	8.97	135.84	288291
2011	12	12	6	1.8	8.91	138.43	280103
2011	12	12	9	1.8	8.81	141.31	276960
2011	12	12	12	1.81	8.7	143.18	276549
2011	12	12	15	1.79	8.58	146.19	266740
2011	12	12	18	1.75	8.53	147	253467
2011	12	12	21	1.71	8.52	147.54	241728
2011	12	13	0	1.69	8.58	147.76	237770
2011	12	13	3	1.75	9.28	145	275753
2011	12	13	6	1.77	9.77	143.95	296986
2011	12	13	9	1.75	10.09	145.53	299822
2011	12	13	12	1.71	10.03	146.46	284570
2011	12	13	15	1.66	10	146.89	267369
2011	12	13	18	1.6	9.98	147.07	247894
2011	12	13	21	1.56	9.95	146.82	234946
2011	12	14	0	1.53	9.89	146.07	224634
2011	12	14	3	1.52	9.79	145.35	219465
2011	12	14	6	1.52	9.64	144.83	216102
2011	12	14	9	1.56	9.39	145.51	221723
2011	12	14	12	1.56	9.2	144.33	217236
2011	12	14	15	1.55	9.01	142.31	210031
2011	12	14	18	1.52	8.69	139.15	194806
2011	12	14	21	1.5	8.22	114.98	179453
2011	12	15	0	1.48	8.23	111.52	174912
2011	12	15	3	1.5	8.23	108.76	179671
2011	12	15	6	1.53	8.19	106.22	186021
2011	12	15	9	1.55	8.15	104.42	189984
2011	12	15	12	1.52	8.13	103.03	182252
2011	12	15	15	1.49	8.16	101.46	175775
2011	12	15	18	1.46	8.23	99.24	170216
2011	12	15	21	1.48	8.36	96.46	177675
2011	12	16	0	1.51	8.48	93.92	187605
2011	12	16	3	1.49	8.45	92.5	182022
2011	12	16	6	1.39	8.36	91.77	156723
2011	12	16	9	1.34	8.35	91.03	145476
2011	12	16	12	1.36	8.47	90.41	152005
2011	12	16	15	1.46	8.68	96	179523
2011	12	16	18	1.49	8.73	94.61	188054
2011	12	16	21	1.48	8.73	93.31	185538
2011	12	17	0	1.47	8.69	92.85	182201
2011	12	17	3	1.45	8.61	86.54	175645
2011	12	17	6	1.34	8.5	86.57	148089
2011	12	17	9	1.23	8.41	86.63	123453
2011	12	17	12	1.12	8.35	86.62	101629
2011	12	17	15	1.05	8.33	86.48	89108.5
2011	12	17	18	0.98	8.37	86.28	77996.2
2011	12	17	21	0.96	8.43	85.98	75381.6
2011	12	18	0	0.98	8.41	85.8	78368.9
2011	12	18	3	1.04	8.33	85.84	87419.3
2011	12	18	6	0.99	8.27	85.94	78645.1
2011	12	18	9	0.9	8.28	85.78	65074.5
2011	12	18	12	0.86	8.41	85.05	60351.6
2011	12	18	15	0.9	8.68	87.01	68218.2
2011	12	18	18	0.96	8.71	86.29	77885.4
2011	12	18	21	0.99	8.65	83.22	82258.7
2011	12	19	0	1	8.46	83.06	82085.4
2011	12	19	3	0.98	8.4	82.94	78275.7
2011	12	19	6	0.97	8.42	82.89	76869
2011	12	19	9	0.99	8.54	82.91	81212.7
2011	12	19	12	1.03	8.69	86.76	89451.9
2011	12	19	15	1.05	8.63	82.76	92317.7
2011	12	19	18	1.03	8.2	82.74	84408
2011	12	19	21	0.98	7.86	80.69	73243.7
2011	12	20	0	0.93	7.76	80.4	65121.3
2011	12	20	3	0.89	7.72	79.75	59332.5
2011	12	20	6	0.87	7.72	79.03	56695.9
2011	12	20	9	0.84	7.71	78.7	52784.7
2011	12	20	12	0.79	7.72	78.88	46748.4
2011	12	20	15	0.76	7.77	79.16	43545.5
2011	12	20	18	0.74	7.84	79.48	41655.8
2011	12	20	21	0.72	7.81	79.72	39283.6
2011	12	21	0	0.71	7.71	80.04	37710.9
2011	12	21	3	0.69	7.63	80.29	35246.7
2011	12	21	6	0.67	7.6	80.43	33102.3
2011	12	21	9	0.65	7.59	80.52	31114.6
2011	12	21	12	0.63	7.58	80.71	29190.8
2011	12	21	15	0.61	7.56	80.9	27294.6
2011	12	21	18	0.6	7.54	81.06	26337.2
2011	12	21	21	0.6	7.53	81	26302.3
2011	12	22	0	0.62	7.5	80.97	27973.1
2011	12	22	3	0.74	7.45	81.05	39583.6
2011	12	22	6	0.81	7.4	81.3	47108.3
2011	12	22	9	0.68	7.34	81.54	32931.3
2011	12	22	12	0.6	7.28	81.72	25429
2011	12	22	15	0.57	7.23	81.57	22792.1
2011	12	22	18	0.56	7.21	81.13	21938.5
2011	12	22	21	0.55	7.2	80.46	21132.6
2011	12	23	0	0.56	7.18	80.04	21847.2
2011	12	23	3	0.69	7.14	79.97	32983.1
2011	12	23	6	0.66	7.07	79.93	29881.5
2011	12	23	9	0.65	7.03	80.34	28818.9
2011	12	23	12	0.66	7.05	81.07	29797
2011	12	23	15	0.74	7.18	82.74	38149
2011	12	23	18	0.84	7.25	83.21	49635.5
2011	12	23	21	0.91	7.3	83.34	58654.5
2011	12	24	0	0.94	7.36	83.06	63100
2011	12	24	3	0.98	7.47	82.35	69609.5
2011	12	24	6	0.95	7.55	81.62	66113.4
2011	12	24	9	0.92	7.6	80.96	62414.4
2011	12	24	12	0.94	7.73	80.11	66272.1
2011	12	24	15	1	7.74	79.67	75099.4
2011	12	24	18	1.02	7.64	80.01	77123.9
2011	12	24	21	1	7.49	80.41	72673.7
2011	12	25	0	0.94	7.35	80.44	63014.2
2011	12	25	3	0.89	7.28	80.11	55950.9
2011	12	25	6	0.86	7.32	79.72	52529.5
2011	12	25	9	0.89	7.38	79.61	56719.4
2011	12	25	12	1.15	6.98	114.28	89566.7
2011	12	25	15	1.61	8.99	195.4	226103
2011	12	25	18	1.95	8.85	193.27	326519
2011	12	25	21	2.15	8.69	189.84	389756
2011	12	26	0	2.29	8.51	181.64	433008
2011	12	26	3	2.38	8.4	178.67	461667
2011	12	26	6	2.42	8.35	175.85	474474
2011	12	26	9	2.4	8.34	173.3	466105
2011	12	26	12	2.34	8.34	171	443091
2011	12	26	15	2.26	8.35	169.37	413808
2011	12	26	18	2.17	8.36	168.89	381963
2011	12	26	21	2.12	8.2	169.37	357586
2011	12	27	0	2.14	7.76	153.07	344814
2011	12	27	3	2.22	12.56	181.96	600608
2011	12	27	6	2.29	12.4	182.19	630940
2011	12	27	9	2.31	12.13	181.98	628030
2011	12	27	12	2.29	11.87	182.22	603973
2011	12	27	15	2.21	11.54	185.33	546872
2011	12	27	18	2.1	11.26	185.1	481806
2011	12	27	21	1.99	11.1	185.02	426506
2011	12	28	0	1.88	11	185.1	377228
2011	12	28	3	1.77	10.95	184.9	332856
2011	12	28	6	1.69	10.94	184.7	303170
2011	12	28	9	1.64	10.91	184.24	284713
2011	12	28	12	1.59	10.84	183.74	265900
2011	12	28	15	1.57	10.63	183.16	254231
2011	12	28	18	1.57	10.37	186.4	248013
2011	12	28	21	1.58	10.27	185.83	248760
2011	12	29	0	1.6	13.07	178.63	324647
2011	12	29	3	1.62	12.94	178.26	329503
2011	12	29	6	1.66	12.67	182.13	338757
2011	12	29	9	1.75	12.15	181.86	361034
2011	12	29	12	1.88	11.75	181.78	402948
2011	12	29	15	1.98	8.93	167.22	339686
2011	12	29	18	2.03	9.06	164.56	362256
2011	12	29	21	2.03	9.15	163.47	365855
2011	12	30	0	2	9.2	162.66	357062
2011	12	30	3	1.96	9.23	161.47	344040
2011	12	30	6	1.92	9.2	160.17	329068
2011	12	30	9	1.86	9.11	159.53	305802
2011	12	30	12	1.79	8.97	159.7	278865
2011	12	30	15	1.71	8.73	160.58	247686
2011	12	30	18	1.65	8.51	154.79	224798
2011	12	30	21	1.62	8.41	154.69	214152
2011	12	31	0	1.59	8.36	154.39	205067
2011	12	31	3	1.58	8.33	154.14	201769
2011	12	31	6	1.57	8.26	154.26	197549
2011	12	31	9	1.55	8.18	154.32	190683
2011	12	31	12	1.53	8.12	153.71	184431
2011	12	31	15	1.51	8.1	152.14	179199
2011	12	31	18	1.45	8.11	149.68	165445
2011	12	31	21	1.47	8.11	146.25	170040
2012	1	1	0	1.5	8.1	142.61	176833
2012	1	1	3	1.56	8.04	138.82	189846
2012	1	1	6	1.56	7.93	135.16	187248
2012	1	1	9	1.52	6.07	101.21	136073
2012	1	1	12	1.51	6.71	99.07	148447
2012	1	1	15	1.47	6.81	96.08	142783
2012	1	1	18	1.42	6.97	96.09	136366
2012	1	1	21	1.49	7.2	99.41	155096
2012	1	2	0	1.58	7.29	103.3	176578
2012	1	2	3	1.78	7.11	121.81	218577
2012	1	2	6	1.91	7.44	121.93	263351
2012	1	2	9	1.91	7.51	124.77	265829
2012	1	2	12	1.88	7.5	126.94	257201
2012	1	2	15	1.83	7.5	128.99	243702
2012	1	2	18	1.76	7.48	131.05	224814
2012	1	2	21	1.69	7.48	132.97	207286
2012	1	3	0	1.62	7.52	134.59	191489
2012	1	3	3	1.57	7.54	137.92	180329
2012	1	3	6	1.6	7.49	150.3	186045
2012	1	3	9	1.71	7.65	165.71	217045
2012	1	3	12	1.84	7.97	168.32	261812
2012	1	3	15	1.96	8.23	176.56	306766
2012	1	3	18	2.04	8.47	180.01	342010
2012	1	3	21	2.07	8.63	180.65	358796
2012	1	4	0	2.05	8.81	176.13	359235
2012	1	4	3	1.99	8.87	175.05	340820
2012	1	4	6	1.92	8.87	173.76	317265
2012	1	4	9	1.84	8.8	172.44	289077
2012	1	4	12	1.75	8.66	174.11	257329
2012	1	4	15	1.66	8.51	172.71	227531
2012	1	4	18	1.57	8.39	171.14	200658
2012	1	4	21	1.46	8.29	169.37	171457
2012	1	5	0	1.4	8.2	167.19	155943
2012	1	5	3	1.36	8.08	164.27	145006
2012	1	5	6	1.33	7.89	160.52	135418
2012	1	5	9	1.23	7.66	165.68	112444
2012	1	5	12	1.13	7.55	162.93	93540.4
2012	1	5	15	1.05	7.46	158.97	79801.9
2012	1	5	18	1	7.37	153.9	71509.4
2012	1	5	21	1.04	7.28	150.49	76400
2012	1	6	0	1.13	7.29	151.99	90319.2
2012	1	6	3	1.27	7.95	154.44	124414
2012	1	6	6	1.33	8.15	169.55	139880
2012	1	6	9	1.34	8.39	177.65	146173
2012	1	6	12	1.35	8.69	185.91	153668
2012	1	6	15	1.35	8.74	184.5	154552
2012	1	6	18	1.31	8.69	182.7	144696
2012	1	6	21	1.26	8.53	180.74	131397
2012	1	7	0	1.19	8.41	179.11	115554
2012	1	7	3	1.12	8.31	177.4	101142
2012	1	7	6	1.05	8.21	175.69	87824.8
2012	1	7	9	0.99	8.12	173.85	77218.6
2012	1	7	12	0.93	8.01	171.87	67219.3
2012	1	7	15	0.87	7.81	167.35	57356.8
2012	1	7	18	0.85	7.56	161.52	52997.5
2012	1	7	21	0.85	7.43	150.48	52086.1
2012	1	8	0	0.87	7.36	138.04	54052
2012	1	8	3	0.87	7.3	129.35	53611.4
2012	1	8	6	0.84	7.21	124.37	49361.6
2012	1	8	9	0.81	7.03	121.16	44752.9
2012	1	8	12	0.77	6.91	121.02	39751.6
2012	1	8	15	0.74	6.84	119.53	36342.5
2012	1	8	18	0.72	6.79	115.59	34153.1
2012	1	8	21	0.72	6.76	109.28	34002.2
2012	1	9	0	0.73	6.73	102.79	34798.2
2012	1	9	3	0.91	12.15	178.71	97623.6
2012	1	9	6	1.22	11.81	178.72	170555
2012	1	9	9	1.51	11.42	182.77	252648
2012	1	9	12	1.71	11.06	182.58	313793
2012	1	9	15	1.84	10.86	182.2	356748
2012	1	9	18	1.89	10.68	181.46	370161
2012	1	9	21	1.93	10.46	183.98	378044
2012	1	10	0	1.93	10.22	183.04	369369
2012	1	10	3	1.92	10.05	181.91	359471
2012	1	10	6	1.91	9.88	180.21	349719
2012	1	10	9	1.94	7.52	97.61	274610
2012	1	10	12	1.87	7.53	99.34	255490
2012	1	10	15	1.76	7.31	100.92	219704
2012	1	10	18	1.62	7.07	94.2	180030
2012	1	10	21	1.5	6.98	95.14	152382
2012	1	11	0	1.44	7.04	95.52	141642
2012	1	11	3	1.44	7.27	105.79	146270
2012	1	11	6	1.43	7.34	105.49	145634
2012	1	11	9	1.44	7.35	105.36	147879
2012	1	11	12	1.4	7.31	105.68	139017
2012	1	11	15	1.32	7.22	105.97	122062
2012	1	11	18	1.22	7.12	96.81	102824
2012	1	11	21	1.16	7.05	97.3	92045.1
2012	1	12	0	1.15	6.98	97.56	89566.7
2012	1	12	3	1.17	6.9	97.19	91646.6
2012	1	12	6	1.17	6.81	96.3	90451.2
2012	1	12	9	1.18	6.73	95.14	90923.2
2012	1	12	12	1.15	6.68	94.38	85717.1
2012	1	12	15	1.09	6.64	94.1	76545
2012	1	12	18	1.03	6.64	94.05	68349.9
2012	1	12	21	1.01	6.72	94.14	66513.2
2012	1	13	0	0.99	6.87	94.71	65331.5
2012	1	13	3	0.98	6.96	95.78	64857
2012	1	13	6	0.96	6.97	96.75	62326.2
2012	1	13	9	0.97	6.96	96.94	63540.2
2012	1	13	12	0.99	6.94	96.04	65997.2
2012	1	13	15	1.01	6.93	94.64	68591.7
2012	1	13	18	1.01	6.91	93.37	68393.7
2012	1	13	21	1.01	6.91	92.38	68393.7
2012	1	14	0	0.99	6.9	91.62	65616.8
2012	1	14	3	0.94	6.92	90.9	59327.7
2012	1	14	6	0.88	6.97	90.25	52371.3
2012	1	14	9	0.85	7.05	89.8	49422.3
2012	1	14	12	0.87	7.2	89.15	52877
2012	1	14	15	0.88	7.32	88.52	55001.2
2012	1	14	18	0.87	7.39	87.59	54272.3
2012	1	14	21	0.89	7.46	86.74	57334.3
2012	1	15	0	0.95	7.52	86.04	65850.7
2012	1	15	3	0.95	7.66	86.01	67076.7
2012	1	15	6	1.01	7.95	94.24	78687.4
2012	1	15	9	1.17	8.17	98.74	108515
2012	1	15	12	1.31	10.75	183.96	178997
2012	1	15	15	1.44	10.71	183.31	215482
2012	1	15	18	1.52	10.62	183.18	238071
2012	1	15	21	1.54	9.07	160.38	208710
2012	1	16	0	1.57	9.07	160.16	216921
2012	1	16	3	1.57	9.06	162.56	216682
2012	1	16	6	1.53	9.05	166.66	205555
2012	1	16	9	1.44	8.99	170.95	180876
2012	1	16	12	1.35	8.88	175.32	157028
2012	1	16	15	1.26	8.72	179.26	134324
2012	1	16	18	1.21	8.4	167.7	119329
2012	1	16	21	1.2	8.23	173.47	114989
2012	1	17	0	1.22	8.15	176.29	117699
2012	1	17	3	1.25	8.09	176.46	122649
2012	1	17	6	1.27	8.04	175.54	125823
2012	1	17	9	1.26	7.94	175.25	122309
2012	1	17	12	1.23	7.78	168	114205
2012	1	17	15	1.2	7.67	169.49	107165
2012	1	17	18	1.2	7.61	171.03	106327
2012	1	17	21	1.21	7.62	172.35	108248
2012	1	18	0	1.22	7.74	173.08	111778
2012	1	18	3	1.22	12.01	181.21	173444
2012	1	18	6	1.25	11.77	181.44	178440
2012	1	18	9	1.26	8.43	172.63	129857
2012	1	18	12	1.23	8.23	172.34	120811
2012	1	18	15	1.17	8.12	172.17	107851
2012	1	18	18	1.1	8.07	172	94744.6
2012	1	18	21	1.03	7.97	171.67	82040.5
2012	1	19	0	0.97	6.4	136.32	58427.7
2012	1	19	3	0.92	6.32	129.82	51902.5
2012	1	19	6	0.87	6.29	126.14	46193.9
2012	1	19	9	0.82	6.3	126.08	41102.1
2012	1	19	12	0.84	6.39	117.6	43747.7
2012	1	19	15	0.95	6.61	101.21	57882.1
2012	1	19	18	1.08	6.86	93.06	77636.7
2012	1	19	21	1.17	7.01	89.17	93107.6
2012	1	20	0	1.22	6.99	87.57	100947
2012	1	20	3	1.25	6.95	87.57	105366
2012	1	20	6	1.31	7.05	88.5	117389
2012	1	20	9	1.36	7.1	89.04	127418
2012	1	20	12	1.37	7.12	89.32	129663
2012	1	20	15	1.36	7.16	89.62	128495
2012	1	20	18	1.33	7.15	90.05	122717
2012	1	20	21	1.28	7.1	90.25	112869
2012	1	21	0	1.2	6.99	90.02	97664.2
2012	1	21	3	1.11	6.9	89.33	82488
2012	1	21	6	1.1	7.24	101.25	85000.1
2012	1	21	9	1.17	8.06	127.26	107054
2012	1	21	12	1.27	8.1	123.47	126762
2012	1	21	15	1.35	8	120.43	141466
2012	1	21	18	1.38	7.95	118.96	146900
2012	1	21	21	1.41	7.95	119.02	153356
2012	1	22	0	1.4	7.99	120.28	151949
2012	1	22	3	1.37	8.02	121.33	146053
2012	1	22	6	1.36	8.07	120.76	144826
2012	1	22	9	1.4	8.08	119.07	153661
2012	1	22	12	1.44	8.04	116.83	161762
2012	1	22	15	1.45	8.02	114.69	163609
2012	1	22	18	1.43	8.02	113.23	159126
2012	1	22	21	1.39	8.03	112.52	150536
2012	1	23	0	1.35	8.03	112.26	141997
2012	1	23	3	1.36	8.01	112.05	143749
2012	1	23	6	1.4	7.97	111.56	151569
2012	1	23	9	1.43	7.82	104.78	155158
2012	1	23	12	1.44	7.55	103.7	151903
2012	1	23	15	1.41	7.48	102.65	144290
2012	1	23	18	1.38	7.48	101.77	138215
2012	1	23	21	1.36	7.5	100.82	134597
2012	1	24	0	1.34	7.54	99.87	131364
2012	1	24	3	1.34	7.59	99.1	132235
2012	1	24	6	1.39	7.58	97.53	142100
2012	1	24	9	1.52	7.61	94.59	170595
2012	1	24	12	1.58	7.67	92.64	185783
2012	1	24	15	1.55	7.66	91.99	178561
2012	1	24	18	1.47	7.61	92.21	159557
2012	1	24	21	1.41	7.55	92.69	145640
2012	1	25	0	1.34	7.51	93.27	130841
2012	1	25	3	1.28	7.47	93.91	118751
2012	1	25	6	1.24	7.45	94.56	111146
2012	1	25	9	1.3	7.47	93.77	122491
2012	1	25	12	1.41	7.63	91.87	147183
2012	1	25	15	1.44	7.78	90.57	156531
2012	1	25	18	1.4	7.88	95.84	149857
2012	1	25	21	1.32	7.95	95.29	134404
2012	1	26	0	1.24	8.03	94.47	119799
2012	1	26	3	1.18	8.1	93.65	109432
2012	1	26	6	1.14	8.13	92.88	102517
2012	1	26	9	1.13	8.14	91.98	100850
2012	1	26	12	1.26	8.14	91.15	125389
2012	1	26	15	1.77	7.59	106.2	230719
2012	1	26	18	1.98	6.61	195.09	251436
2012	1	26	21	1.89	6.67	191.3	231177
2012	1	27	0	1.77	6.69	185.62	203361
2012	1	27	3	1.71	7.02	184.14	199170
2012	1	27	6	1.71	7.3	179.14	207115
2012	1	27	9	1.74	7.63	182.61	224140
2012	1	27	12	1.82	8.07	183.61	259365
2012	1	27	15	1.96	8.48	184	316085
2012	1	27	18	2.09	9.58	187.61	406026
2012	1	27	21	2.18	9.82	187.14	452814
2012	1	28	0	2.19	9.82	186.48	456978
2012	1	28	3	2.16	9.79	185.58	443186
2012	1	28	6	2.1	9.74	184.45	416767
2012	1	28	9	2.05	9.66	182.94	393895
2012	1	28	12	2.02	9.49	180.9	375720
2012	1	28	15	1.98	9.27	179.48	352619
2012	1	28	18	1.95	9.15	177.88	337587
2012	1	28	21	1.92	9.06	176.28	324061
2012	1	29	0	1.87	9	174.75	305366
2012	1	29	3	1.81	8.94	173.21	284178
2012	1	29	6	1.75	8.88	171.93	263867
2012	1	29	9	1.69	8.81	170.77	244143
2012	1	29	12	1.62	8.72	169.54	222046
2012	1	29	15	1.58	8.63	160.22	209036
2012	1	29	18	1.54	8.54	158.76	196515
2012	1	29	21	1.51	8.45	157.34	186942
2012	1	30	0	1.47	8.36	156.2	175282
2012	1	30	3	1.41	8.28	155.34	159722
2012	1	30	6	1.36	8.21	154.64	147339
2012	1	30	9	1.33	8.18	153.45	140395
2012	1	30	12	1.32	8.23	151.56	139137
2012	1	30	15	1.33	8.34	149.1	143141
2012	1	30	18	1.31	8.32	146.57	138536
2012	1	30	21	1.28	8.24	144.4	130991
2012	1	31	0	1.23	8.13	142.44	119343
2012	1	31	3	1.18	7.99	140.25	107946
2012	1	31	6	1.13	7.77	134.27	96266.1
2012	1	31	9	1.28	7.63	130.65	121294
2012	1	31	12	1.11	7.57	126.36	90497.7
2012	1	31	15	1	7.53	121.46	73061.8
2012	1	31	18	0.92	7.49	116.72	61511
2012	1	31	21	0.86	7.43	113.4	53318.9
2012	2	1	0	0.82	7.38	111.56	48148.2
2012	2	1	3	0.78	7.34	109.43	43329.2
2012	2	1	6	0.79	7.33	105.89	44386.8
2012	2	1	9	0.84	7.33	101.58	50183.2
2012	2	1	12	0.83	7.3	98.48	48794.9
2012	2	1	15	0.87	7.22	96.81	53023.8
2012	2	1	18	0.94	7.06	95.26	60527.9
2012	2	1	21	1.02	7.02	93.7	70865.2
2012	2	2	0	1.12	7.17	94.19	87267.1
2012	2	2	3	1.23	7.4	92.68	108627
2012	2	2	6	1.39	7.58	90.81	142100
2012	2	2	9	1.58	7.59	88.92	183845
2012	2	2	12	1.71	7.63	88.46	216477
2012	2	2	15	1.7	7.64	89.13	214233
2012	2	2	18	1.63	7.64	90.49	196954
2012	2	2	21	1.58	7.62	91.86	184572
2012	2	3	0	1.56	7.54	92.92	178039
2012	2	3	3	1.62	7.42	93.81	188942
2012	2	3	6	1.73	7.18	93.96	208503
2012	2	3	9	1.8	7.08	87.25	222574
2012	2	3	12	1.82	7.08	86.11	227547
2012	2	3	15	1.77	7.08	86.17	215216
2012	2	3	18	1.67	7.07	87.3	191315
2012	2	3	21	1.58	7.05	88.67	170765
2012	2	4	0	1.53	7.04	89.98	159901
2012	2	4	3	1.55	7.02	90.44	163642
2012	2	4	6	1.65	6.9	88.6	182269
2012	2	4	9	1.77	6.94	85.23	210961
2012	2	4	12	1.77	7	83.5	212785
2012	2	4	15	1.67	7.01	83.66	189691
2012	2	4	18	1.52	7.01	85.3	157145
2012	2	4	21	1.39	7.04	87.25	131977
2012	2	5	0	1.31	7.06	89.27	117555
2012	2	5	3	1.29	6.97	91.08	112540
2012	2	5	6	1.3	6.83	92.49	111996
2012	2	5	9	1.29	6.72	92.34	108504
2012	2	5	12	1.29	6.7	90.95	108181
2012	2	5	15	1.28	6.75	89.78	107305
2012	2	5	18	1.24	6.81	89.77	101598
2012	2	5	21	1.21	6.86	90.52	97451.9
2012	2	6	0	1.16	6.92	91.6	90347.8
2012	2	6	3	1.11	7.01	92.74	83803
2012	2	6	6	1.07	8.84	126.86	98200.9
2012	2	6	9	1.06	8.8	127.78	95937.8
2012	2	6	12	1.08	7.87	98.23	89067.2
2012	2	6	15	1.1	7.89	107.51	92631.3
2012	2	6	18	1.09	7.78	98.58	89686.7
2012	2	6	21	1.07	7.69	98.98	85425.9
2012	2	7	0	1.05	7.63	99.25	81620.4
2012	2	7	3	1.02	7.58	99.3	76518.3
2012	2	7	6	0.99	7.55	99.28	71798.1
2012	2	7	9	0.95	7.55	99.21	66113.4
2012	2	7	12	0.9	7.6	99.45	59730.2
2012	2	7	15	0.86	7.66	99.58	54969.4
2012	2	7	18	0.85	7.7	99.02	53978.9
2012	2	7	21	0.86	7.72	97.62	55400
2012	2	8	0	0.87	7.7	96.05	56549
2012	2	8	3	0.88	7.71	94.68	57931.6
2012	2	8	6	0.89	7.78	94.23	59793.7
2012	2	8	9	0.89	7.82	95.08	60101.1
2012	2	8	12	0.89	7.81	97.4	60024.2
2012	2	8	15	0.87	7.78	100.86	57136.5
2012	2	8	18	0.85	7.73	104.5	54189.2
2012	2	8	21	0.83	7.66	106.73	51201.2
2012	2	9	0	0.81	7.6	106.77	48381.5
2012	2	9	3	0.8	17.69	171.93	109851
2012	2	9	6	0.79	17.52	172.27	106092
2012	2	9	9	0.79	17.25	170.62	104457
2012	2	9	12	0.78	16.58	176.13	97874.4
2012	2	9	15	0.77	16.2	174.45	93194.9
2012	2	9	18	0.76	16.03	175.32	89837.2
2012	2	9	21	0.75	15.89	173.72	86724.5
2012	2	10	0	0.75	15.75	174.53	85960.4
2012	2	10	3	0.77	15.51	173.14	89225.5
2012	2	10	6	0.8	14.65	179.1	90973.1
2012	2	10	9	0.83	12.09	185.25	80812.4
2012	2	10	12	0.85	11.45	183.4	80267.3
2012	2	10	15	0.86	11.2	184.72	80373.1
2012	2	10	18	0.86	10.98	185.17	78794.3
2012	2	10	21	0.88	10.46	186.36	78594.6
2012	2	11	0	0.91	10.14	186.13	81473.5
2012	2	11	3	0.96	9.9	183.95	88526.5
2012	2	11	6	0.98	8.27	89.75	77064.3
2012	2	11	9	0.99	8.5	91.13	80832.3
2012	2	11	12	1.07	8.74	131.33	97090
2012	2	11	15	1.24	8.9	141.22	132779
2012	2	11	18	1.47	9.22	157.96	193313
2012	2	11	21	1.67	10.89	187.35	294684
2012	2	12	0	1.76	10.83	186.93	325499
2012	2	12	3	1.78	10.75	186.99	330479
2012	2	12	6	1.75	10.61	187.36	315273
2012	2	12	9	1.69	9.69	184.73	268530
2012	2	12	12	1.62	9.66	185.17	245982
2012	2	12	15	1.57	9.13	156.05	218356
2012	2	12	18	1.53	8.66	113.75	196696
2012	2	12	21	1.5	8.49	107.36	185347
2012	2	13	0	1.45	8.38	106.2	170953
2012	2	13	3	1.41	8.35	110.54	161072
2012	2	13	6	1.4	8.48	122.93	161268
2012	2	13	9	1.41	8.58	139.53	165509
2012	2	13	12	1.37	8.51	152.42	154977
2012	2	13	15	1.31	8.28	159.58	137870
2012	2	13	18	1.25	8.15	162.56	123559
2012	2	13	21	1.24	8.04	162.55	119949
2012	2	14	0	1.21	7.92	163.34	112510
2012	2	14	3	1.17	7.64	116.07	101475
2012	2	14	6	1.17	7.39	121.28	98154.8
2012	2	14	9	1.24	7.17	119.95	106969
2012	2	14	12	1.35	7.04	90.78	124490
2012	2	14	15	1.42	7.06	90.59	138126
2012	2	14	18	1.41	7.09	92.49	136767
2012	2	14	21	1.41	7.08	94.5	136574
2012	2	15	0	1.45	7.02	95.65	143208
2012	2	15	3	1.58	6.74	93.92	163256
2012	2	15	6	1.71	6.62	90.96	187822
2012	2	15	9	1.73	6.77	89.07	196597
2012	2	15	12	1.65	6.85	88.86	180948
2012	2	15	15	1.53	6.86	90	155813
2012	2	15	18	1.4	6.86	91.84	130460
2012	2	15	21	1.35	6.94	93.73	122722
2012	2	16	0	1.29	7.14	95.29	115285
2012	2	16	3	1.26	7.28	97.99	112142
2012	2	16	6	1.38	7.38	97.57	136367
2012	2	16	9	1.44	7.4	96.83	148885
2012	2	16	12	1.39	7.4	95.92	138726
2012	2	16	15	1.32	7.41	94.95	125274
2012	2	16	18	1.25	7.45	94.11	112946
2012	2	16	21	1.24	7.51	93.42	112041
2012	2	17	0	1.28	7.6	93	120817
2012	2	17	3	1.35	7.71	92.87	136338
2012	2	17	6	1.41	7.79	93.2	150270
2012	2	17	9	1.42	7.81	93.68	152800
2012	2	17	12	1.42	7.82	93.95	152996
2012	2	17	15	1.37	7.88	93.73	143504
2012	2	17	18	1.32	7.92	96.95	133896
2012	2	17	21	1.33	7.94	95.47	136276
2012	2	18	0	1.33	7.96	94.52	136619
2012	2	18	3	1.34	7.99	93.96	139204
2012	2	18	6	1.33	8.04	93.69	137992
2012	2	18	9	1.27	8.05	93.55	125979
2012	2	18	12	1.22	8.03	93.69	115966
2012	2	18	15	1.16	7.98	94.15	104187
2012	2	18	18	1.12	7.93	94.92	96517.2
2012	2	18	21	1.14	7.88	95.9	99364.5
2012	2	19	0	1.15	7.79	92.3	99960.6
2012	2	19	3	1.14	7.71	92.82	97220.9
2012	2	19	6	1.13	7.5	93.63	92921
2012	2	19	9	1.14	6.57	95.98	82845.8
2012	2	19	12	1.15	6.52	95.06	83664
2012	2	19	15	1.17	6.57	94.09	87263.5
2012	2	19	18	1.14	6.59	94.17	83098
2012	2	19	21	1.09	6.59	94.94	75968.6
2012	2	20	0	1.04	6.57	95.86	68948.9
2012	2	20	3	0.98	6.54	96.75	60943.2
2012	2	20	6	0.92	6.51	93.98	53462.9
2012	2	20	9	0.93	6.45	93.43	54127.9
2012	2	20	12	1.01	6.47	91.88	64038.7
2012	2	20	15	1.06	6.46	90.45	70427.1
2012	2	20	18	1.06	6.42	89.43	69991
2012	2	20	21	1.02	6.4	88.86	64606.4
2012	2	21	0	0.97	6.37	88.5	58153.8
2012	2	21	3	0.9	6.36	88.39	49984.8
2012	2	21	6	0.85	6.4	88.46	44865.6
2012	2	21	9	0.9	6.46	86.79	50770.7
2012	2	21	12	1.07	6.62	88.05	73539.6
2012	2	21	15	1.19	6.83	86.45	93844.8
2012	2	21	18	1.2	6.83	86.15	95428.6
2012	2	21	21	1.17	6.78	86.42	90052.7
2012	2	22	0	1.11	6.67	86.81	79738.4
2012	2	22	3	1.04	6.48	83.28	68004.4
2012	2	22	6	0.96	6.41	83.75	57318.7
2012	2	22	9	0.9	6.39	83.63	50220.5
2012	2	22	12	0.91	6.68	83.78	53672.9
2012	2	22	15	0.97	6.96	81.9	63540.2
2012	2	22	18	0.98	6.91	81.46	64391.1
2012	2	22	21	0.95	6.84	81.36	59896.1
2012	2	23	0	0.91	6.78	81.29	54476.4
2012	2	23	3	0.87	6.74	81	49498.7
2012	2	23	6	0.84	7.99	97.34	54701.7
2012	2	23	9	0.84	8.03	97.75	54975.6
2012	2	23	12	0.84	8.03	97.32	54975.6
2012	2	23	15	0.86	8	96.18	57409.3
2012	2	23	18	0.9	7.98	94.03	62716.7
2012	2	23	21	0.92	7.95	92.51	65288.7
2012	2	24	0	0.92	7.81	88.39	64139
2012	2	24	3	0.89	7.5	88.62	57641.7
2012	2	24	6	0.85	7.23	89.92	50684.1
2012	2	24	9	0.88	7.57	97.26	56879.6
2012	2	24	12	0.99	8.11	143.56	77123.5
2012	2	24	15	1.16	10.04	188.46	131083
2012	2	24	18	1.31	9.91	187.77	165011
2012	2	24	21	1.4	9.8	187.2	186371
2012	2	25	0	1.44	9.64	186.83	193954
2012	2	25	3	1.43	9.26	187.26	183729
2012	2	25	6	1.39	9.09	186.99	170408
2012	2	25	9	1.34	9.01	186.66	156975
2012	2	25	12	1.28	8.95	186.42	142278
2012	2	25	15	1.24	8.88	186.49	132480
2012	2	25	18	1.21	8.77	187.07	124585
2012	2	25	21	1.24	8.6	181.03	128303
2012	2	26	0	1.29	8.4	182.33	135630
2012	2	26	3	1.32	8.2	182.49	138630
2012	2	26	6	1.32	8	181.59	135249
2012	2	26	9	1.34	7.68	150.22	133803
2012	2	26	12	1.41	7.48	126.73	144290
2012	2	26	15	1.48	7.47	109.16	158759
2012	2	26	18	1.47	7.49	100.72	157041
2012	2	26	21	1.4	7.44	96.58	141490
2012	2	27	0	1.31	7.42	94.52	123550
2012	2	27	3	1.22	7.88	104.66	113800
2012	2	27	6	1.13	7.96	106.32	98620.1
2012	2	27	9	1.06	8	107.4	87216.2
2012	2	27	12	1.04	8.01	105.78	84061
2012	2	27	15	1.12	12.05	179.8	146662
2012	2	27	18	1.23	11.76	179.46	172629
2012	2	27	21	1.31	11.24	180.13	187156
2012	2	28	0	1.35	10.93	180.7	193278
2012	2	28	3	1.33	10.66	180.92	182960
2012	2	28	6	1.27	10.25	182.38	160408
2012	2	28	9	1.19	9.98	183.25	137126
2012	2	28	12	1.15	9.84	184.04	126266
2012	2	28	15	1.36	15.25	185.64	273680
2012	2	28	18	1.74	15.24	186.23	447692
2012	2	28	21	2.01	13.68	189.9	536258
2012	2	29	0	2.11	13.15	188.92	568049
2012	2	29	3	2.09	12.96	188.1	549279
2012	2	29	6	2.03	12.84	188.1	513396
2012	2	29	9	1.96	12.55	193.73	467791
2012	2	29	12	1.96	12.36	193.58	460708
2012	2	29	15	1.94	12.18	193.32	444781
2012	2	29	18	1.86	12.04	193.32	404155
2012	2	29	21	1.78	11.93	192.88	366755
2012	3	1	0	1.72	11.8	192.25	338715
2012	3	1	3	1.65	11.59	190.98	306159
2012	3	1	6	1.59	11.17	196.11	273995
2012	3	1	9	1.56	11.01	195.39	259975
2012	3	1	12	1.58	10.93	194.09	264746
2012	3	1	15	1.62	10.87	191.22	276793
2012	3	1	18	1.61	10.79	188.17	271374
2012	3	1	21	1.55	10.69	185.84	249193
2012	3	2	0	1.46	10.55	185.02	218199
2012	3	2	3	1.38	10.3	189.19	190323
2012	3	2	6	1.29	10.15	187.59	163886
2012	3	2	9	1.21	10.04	186.44	142626
2012	3	2	12	1.14	9.96	185.81	125593
2012	3	2	15	1.08	9.86	185.31	111589
2012	3	2	18	1.03	9.75	184.57	100363
2012	3	2	21	1.02	9.52	183.87	96102.1
2012	3	3	0	1.01	8.96	181.21	88684.2
2012	3	3	3	0.97	8.79	178.33	80246.8
2012	3	3	6	0.92	8.75	175.6	71858.7
2012	3	3	9	0.88	8.76	173.42	65821.1
2012	3	3	12	0.95	8.82	172.21	77234.5
2012	3	3	15	1.1	9.58	169.38	112473
2012	3	3	18	1.23	9.74	168.07	142977
2012	3	3	21	1.25	9.7	166.4	147058
2012	3	4	0	1.18	9.59	164.55	129562
2012	3	4	3	1.08	8.98	167.53	101629
2012	3	4	6	1	8.34	170.72	80921.1
2012	3	4	9	0.95	8	174.73	70054
2012	3	4	12	0.95	7.62	183.1	66726.4
2012	3	4	15	0.99	7.54	184.56	71703
2012	3	4	18	1.06	7.55	183.45	82310.3
2012	3	4	21	1.15	11.89	156.16	152571
2012	3	5	0	1.25	11.74	157.68	177985
2012	3	5	3	1.35	11.67	158.39	206364
2012	3	5	6	1.45	11.64	158.39	237457
2012	3	5	9	1.55	11.61	157.75	270639
2012	3	5	12	1.63	11.46	159.01	295431
2012	3	5	15	1.68	11.24	158.81	307808
2012	3	5	18	1.69	11.12	158.63	308158
2012	3	5	21	1.69	11.05	158.31	306218
2012	3	6	0	1.67	11.02	158.03	298202
2012	3	6	3	1.63	10.98	157.62	283056
2012	3	6	6	1.59	10.95	157.23	268599
2012	3	6	9	1.54	10.92	156.69	251281
2012	3	6	12	1.5	10.91	156.11	238179
2012	3	6	15	1.45	10.91	155.43	222565
2012	3	6	18	1.41	10.93	154.83	210840
2012	3	6	21	1.41	10.98	154.06	211805
2012	3	7	0	1.41	11.07	153.17	213541
2012	3	7	3	1.41	11.31	151.83	218171
2012	3	7	6	1.43	11.62	146.63	230555
2012	3	7	9	1.43	11.67	146	231547
2012	3	7	12	1.42	11.62	145.5	227341
2012	3	7	15	1.42	11.23	147.1	219711
2012	3	7	18	1.41	10.99	146.51	211998
2012	3	7	21	1.41	10.87	146.01	209683
2012	3	8	0	1.4	10.77	145.68	204818
2012	3	8	3	1.37	10.66	145.3	194131
2012	3	8	6	1.34	10.5	145.03	182934
2012	3	8	9	1.32	10.29	145.97	173964
2012	3	8	12	1.32	10.16	145.56	171766
2012	3	8	15	1.31	10.07	145.22	167675
2012	3	8	18	1.29	9.99	144.98	161302
2012	3	8	21	1.26	9.92	144.75	152809
2012	3	9	0	1.22	9.85	144.56	142250
2012	3	9	3	1.17	9.79	144.37	130032
2012	3	9	6	1.12	9.72	144.11	118304
2012	3	9	9	1.06	9.63	143.64	104987
2012	3	9	12	1	9.5	144.22	92176.3
2012	3	9	15	0.95	9.38	144.04	82138.3
2012	3	9	18	0.9	9.34	143.72	73405.3
2012	3	9	21	0.88	9.31	143.18	69953.7
2012	3	10	0	0.85	9.29	143.17	65125.2
2012	3	10	3	0.85	9.25	143.9	64844.8
2012	3	10	6	0.9	9.2	144.96	72305
2012	3	10	9	0.93	9.15	145.51	76786.1
2012	3	10	12	0.88	9.1	145.05	68375.8
2012	3	10	15	0.84	9.05	143.57	61958.8
2012	3	10	18	0.79	8.99	141.53	54438.9
2012	3	10	21	0.77	6.57	111.73	37795.7
2012	3	11	0	0.85	6.44	104.72	45146
2012	3	11	3	0.93	13.93	173.94	116899
2012	3	11	6	1.04	13.3	170.05	139577
2012	3	11	9	1.24	12.9	167.26	192455
2012	3	11	12	1.49	12.36	172.46	266248
2012	3	11	15	1.68	11.94	171.41	326978
2012	3	11	18	1.77	11.33	173.89	344407
2012	3	11	21	1.77	11.06	173.7	336200
2012	3	12	0	1.7	10.91	173.6	305927
2012	3	12	3	1.58	13.37	161.34	323848
2012	3	12	6	1.46	12.96	161.51	268044
2012	3	12	9	1.35	11.99	166.85	212023
2012	3	12	12	1.26	11.75	167.2	180998
2012	3	12	15	1.18	11.24	172.47	151854
2012	3	12	18	1.13	10.87	171.55	134673
2012	3	12	21	1.08	10.66	170.53	120642
2012	3	13	0	1.04	10.36	174.21	108723
2012	3	13	3	1	10.12	173.33	98192
2012	3	13	6	0.94	10.02	172.46	85905.1
2012	3	13	9	0.88	9.97	171.45	74912.8
2012	3	13	12	0.84	12.29	155.5	84140.7
2012	3	13	15	0.83	12.09	155.47	80812.4
2012	3	13	18	0.83	11.93	155.8	79742.9
2012	3	13	21	0.85	11.72	155.93	82160.1
2012	3	14	0	0.86	11.3	159.79	81090.7
2012	3	14	3	0.88	11.07	160.42	83178
2012	3	14	6	0.9	10.91	161.2	85744.3
2012	3	14	9	0.93	10.73	161.95	90045.3
2012	3	14	12	0.98	10.38	167.39	96726.4
2012	3	14	15	1.04	10.11	167.23	106100
2012	3	14	18	1.12	10.04	167.41	122198
2012	3	14	21	1.19	10.05	168.16	138088
2012	3	15	0	1.24	10.29	169.57	153516
2012	3	15	3	1.29	11.81	174	190689
2012	3	15	6	1.32	11.76	173.96	198816
2012	3	15	9	1.33	11.64	173.5	199780
2012	3	15	12	1.35	11.28	176.87	199468
2012	3	15	15	1.38	11.01	176.9	203442
2012	3	15	18	1.39	10.86	176.85	203589
2012	3	15	21	1.37	10.79	176.73	196498
2012	3	16	0	1.32	10.72	176.76	181233
2012	3	16	3	1.28	10.63	176.67	168985
2012	3	16	6	1.27	10.01	174.63	156652
2012	3	16	9	1.33	9.79	175.22	168028
2012	3	16	12	1.42	7.66	149.39	149865
2012	3	16	15	1.52	7.58	172.66	169923
2012	3	16	18	1.59	7.52	177.98	184462
2012	3	16	21	1.7	7.4	177.71	207503
2012	3	17	0	1.78	7.3	177.07	224418
2012	3	17	3	1.81	7.31	176.26	232365
2012	3	17	6	1.83	9.95	184.98	323311
2012	3	17	9	1.84	9.89	185.17	324883
2012	3	17	12	1.84	9.95	184.38	326854
2012	3	17	15	1.83	10.48	183.53	340533
2012	3	17	18	1.8	13.29	156.29	417797
2012	3	17	21	1.76	13.18	155.4	396129
2012	3	18	0	1.71	13.08	155.14	371104
2012	3	18	3	1.67	12.88	154.67	348533
2012	3	18	6	1.64	12.22	159.19	318900
2012	3	18	9	1.61	12.03	158.25	302561
2012	3	18	12	1.58	11.93	157.91	288968
2012	3	18	15	1.54	11.83	157.25	272221
2012	3	18	18	1.52	11.66	156.73	261385
2012	3	18	21	1.51	11.21	161.08	248002
2012	3	19	0	1.5	11.03	160.38	240798
2012	3	19	3	1.5	10.96	159.75	239270
2012	3	19	6	1.49	10.88	159.27	234367
2012	3	19	9	1.47	10.77	158.68	225811
2012	3	19	12	1.44	10.61	158.07	213470
2012	3	19	15	1.42	10.24	162.84	200342
2012	3	19	18	1.39	9.88	162.58	185218
2012	3	19	21	1.38	8.34	151.51	154106
2012	3	20	0	1.35	8.17	149.28	144472
2012	3	20	3	1.33	7.99	144.98	137134
2012	3	20	6	1.31	7.81	129.77	130044
2012	3	20	9	1.29	7.71	127.39	124489
2012	3	20	12	1.27	7.67	124.55	120032
2012	3	20	15	1.26	7.7	121.28	118612
2012	3	20	18	1.24	7.78	117.77	116070
2012	3	20	21	1.24	7.82	114.63	116666
2012	3	21	0	1.24	7.78	112.32	116070
2012	3	21	3	1.23	7.72	110.88	113324
2012	3	21	6	1.23	7.69	110.1	112884
2012	3	21	9	1.21	7.66	109.68	108817
2012	3	21	12	1.17	7.61	109.5	101077
2012	3	21	15	1.13	7.56	109.4	93664.3
2012	3	21	18	1.09	7.51	109.04	86574.2
2012	3	21	21	1.06	7.48	108.32	81547.2
2012	3	22	0	1.06	7.52	106.45	81983.2
2012	3	22	3	1.09	7.74	103.17	89225.6
2012	3	22	6	1.13	7.92	98.67	98124.5
2012	3	22	9	1.12	7.91	97.92	96273.8
2012	3	22	12	1.08	7.82	95.72	88501.3
2012	3	22	15	1.02	7.72	95.56	77931.5
2012	3	22	18	0.98	7.67	96.28	71473.2
2012	3	22	21	0.95	7.67	97.32	67164.2
2012	3	23	0	0.93	8.08	106.39	67806.7
2012	3	23	3	0.93	8.76	163.85	73513.2
2012	3	23	6	0.94	8.74	168.03	74931.2
2012	3	23	9	0.96	8.56	151.24	76544.1
2012	3	23	12	1	8.45	162.58	81988.4
2012	3	23	15	1.03	8.44	167.81	86878.5
2012	3	23	18	1.05	11.85	183.95	126763
2012	3	23	21	1.07	8.79	178.07	97645.5
2012	3	24	0	1.07	8.81	180.68	97867.6
2012	3	24	3	1.07	8.74	182.85	97090
2012	3	24	6	1.06	8.45	171.08	92122.1
2012	3	24	9	1.05	8.2	168.64	87717.9
2012	3	24	12	1.04	8.16	162.58	85635.2
2012	3	24	15	1.02	8.17	154.01	82474.2
2012	3	24	18	1.01	8.17	147.74	80865
2012	3	24	21	1.01	8.14	146.31	80568
2012	3	25	0	1.02	13.12	180.03	132443
2012	3	25	3	1.04	12.68	182.65	133070
2012	3	25	6	1.09	12.15	183.87	140063
2012	3	25	9	1.18	11.93	184.12	161176
2012	3	25	12	1.27	11.71	184.04	183257
2012	3	25	15	1.35	11.28	188.31	199468
2012	3	25	18	1.41	10.94	188.62	211033
2012	3	25	21	1.44	10.74	188.57	216085
2012	3	26	0	1.43	10.41	191.41	206547
2012	3	26	3	1.4	10.02	191.66	190555
2012	3	26	6	1.39	9.88	191.78	185218
2012	3	26	9	1.35	9.82	191.8	173650
2012	3	26	12	1.32	9.83	191.54	166187
2012	3	26	15	1.31	11.68	182.8	194483
2012	3	26	18	1.31	11.32	185.55	188488
2012	3	26	21	1.31	11	185.04	183160
2012	3	27	0	1.39	10.77	184.65	201902
2012	3	27	3	1.43	10.65	184.18	211309
2012	3	27	6	1.34	10.71	184.07	186593
2012	3	27	9	1.23	10.73	183.76	157509
2012	3	27	12	1.19	10.71	183.53	147156
2012	3	27	15	1.22	10.65	183.02	153803
2012	3	27	18	1.25	10.22	184.6	154941
2012	3	27	21	1.27	8.05	130.6	125979
2012	3	28	0	1.27	8.14	118.73	127388
2012	3	28	3	1.25	8.18	113.82	124013
2012	3	28	6	1.28	8.19	111.97	130197
2012	3	28	9	1.54	8.17	111.49	188001
2012	3	28	12	2.5	7.07	193.68	428741
2012	3	28	15	3.26	8.86	198.89	913618
2012	3	28	18	3.42	9.3	197.56	1.05543e+06
2012	3	28	21	3.27	9.51	195.11	986669
2012	3	29	0	3.08	9.76	190.38	898352
2012	3	29	3	2.88	9.96	190.35	801567
2012	3	29	6	2.7	10.15	191.16	717942
2012	3	29	9	2.56	10.33	192.47	656864
2012	3	29	12	2.48	10.75	190.83	641516
2012	3	29	15	2.47	11.89	188.5	703836
2012	3	29	18	2.47	12.43	189.93	735801
2012	3	29	21	2.46	12.2	190.53	716351
2012	3	30	0	2.38	11.97	190.88	657875
2012	3	30	3	2.27	11.78	190.59	588969
2012	3	30	6	2.17	11.43	192.72	522229
2012	3	30	9	2.08	11.05	192.43	463857
2012	3	30	12	1.99	10.89	192.16	418437
2012	3	30	15	1.91	10.75	191.32	380514
2012	3	30	18	1.84	10.52	189.43	345579
2012	3	30	21	1.77	10.12	188.76	307626
2012	3	31	0	1.7	9.98	187.55	279849
2012	3	31	3	1.61	9.89	185.4	248739
2012	3	31	6	1.51	9.77	182.65	216144
2012	3	31	9	1.39	9.59	179.71	179781
2012	3	31	12	1.3	9.35	176.39	153318
2012	3	31	15	1.23	9.31	173.67	136664
2012	3	31	18	1.17	9.38	170.82	124586
2012	3	31	21	1.14	9.37	170.1	118153
2012	4	1	0	1.12	9.13	171.5	111123
2012	4	1	3	1.1	8.97	172.94	105311
2012	4	1	6	1.08	8.85	171.74	100158
2012	4	1	9	1.07	8.62	167.39	95757
2012	4	1	12	1.05	8.37	168.44	89536.4
2012	4	1	15	1.04	8.26	166.8	86684.7
2012	4	1	18	1.02	8.15	162.47	82272.3
2012	4	1	21	1	8	156.12	77622.1
2012	4	2	0	0.99	7.76	164.38	73795.1
2012	4	2	3	0.98	7.64	162.55	71193.6
2012	4	2	6	0.99	7.58	158.96	72083.4
2012	4	2	9	0.99	7.53	154.67	71607.9
2012	4	2	12	1	7.44	149.88	72188.6
2012	4	2	15	0.99	7.26	145.95	69040.3
2012	4	2	18	0.98	10.75	181.89	100174
2012	4	2	21	0.96	10.85	182.41	97021.4
2012	4	3	0	0.94	10.81	182.53	92678.1
2012	4	3	3	0.92	10.72	182.18	88037.2
2012	4	3	6	0.91	10.6	181.55	85169.5
2012	4	3	9	0.91	9.96	176.61	80027.2
2012	4	3	12	0.93	9.2	159.28	77205.7
2012	4	3	15	0.96	8.93	156.36	79852.7
2012	4	3	18	0.99	8.65	144.77	82258.7
2012	4	3	21	1	8.31	144.46	80630
2012	4	4	0	0.98	8.08	144.2	75293.8
2012	4	4	3	0.95	7.93	144.01	69441
2012	4	4	6	0.93	7.83	137.27	65708.8
2012	4	4	9	0.91	7.77	136.79	62430.9
2012	4	4	12	0.89	7.72	136.05	59332.5
2012	4	4	15	0.89	7.66	135	58871.4
2012	4	4	18	0.91	7.56	133.69	60743.5
2012	4	4	21	0.92	7.42	131.72	60936.2
2012	4	5	0	0.92	7.28	129.24	59786.4
2012	4	5	3	0.88	7.18	126.46	53949.2
2012	4	5	6	0.83	6.69	118.23	44717.5
2012	4	5	9	0.83	6.67	110.31	44583.8
2012	4	5	12	0.91	6.75	101.15	54235.3
2012	4	5	15	1.01	6.84	95.92	67700.9
2012	4	5	18	1.06	6.9	93.4	75224
2012	4	5	21	1.07	6.91	92.15	76761.1
2012	4	6	0	1.09	6.92	91.5	79772.8
2012	4	6	3	1.09	10.39	185.57	119774
2012	4	6	6	1.05	10.01	185	107080
2012	4	6	9	0.99	9.69	183.93	92148.8
2012	4	6	12	0.93	9.33	182.28	78296.6
2012	4	6	15	0.87	9.19	180.58	67491.6
2012	4	6	18	0.8	9.13	177.48	56695.2
2012	4	6	21	0.75	9.12	171.69	49775.2
2012	4	7	0	0.72	9.14	161.69	45973.4
2012	4	7	3	0.69	9.7	164.48	44809
2012	4	7	6	0.66	9.94	161.04	42011.7
2012	4	7	9	0.62	9.88	158.07	36849.9
2012	4	7	12	0.6	9.79	154.62	34196.4
2012	4	7	15	0.6	7.15	126.62	24974.9
2012	4	7	18	0.64	7.16	151.78	28455.6
2012	4	7	21	0.69	7.24	166.83	33445.1
2012	4	8	0	0.8	7.79	175.02	48374.1
2012	4	8	3	0.98	8.54	181.04	79580.3
2012	4	8	6	1.07	8.8	185.27	97756.5
2012	4	8	9	1.12	8.84	186.16	107593
2012	4	8	12	1.13	8.77	186.62	108656
2012	4	8	15	1.14	8.68	186.97	109452
2012	4	8	18	1.19	8.73	187.72	119951
2012	4	8	21	1.37	9.9	186.99	180290
2012	4	9	0	1.55	11.6	183.46	270406
2012	4	9	3	1.67	11.6	183.62	313897
2012	4	9	6	1.72	11.39	188.68	326946
2012	4	9	9	1.73	11.22	188.87	325822
2012	4	9	12	1.69	11.21	189.21	310652
2012	4	9	15	1.62	11.37	190.04	289525
2012	4	9	18	1.55	11.61	191.68	270639
2012	4	9	21	1.51	11.7	192.22	258842
2012	4	10	0	1.51	11.75	191.96	259948
2012	4	10	3	1.57	11.91	190.88	284844
2012	4	10	6	1.66	12.2	190.05	326191
2012	4	10	9	1.74	12.31	188.91	361620
2012	4	10	12	1.79	12.17	187.99	378349
2012	4	10	15	1.81	11.95	186.83	379857
2012	4	10	18	1.82	11.74	186.06	377317
2012	4	10	21	1.83	11.51	191.01	374001
2012	4	11	0	1.83	11.27	190.64	366203
2012	4	11	3	1.82	11.1	190.01	356748
2012	4	11	6	1.84	10.97	189.55	360361
2012	4	11	9	1.8	10.84	189.03	340777
2012	4	11	12	1.73	10.68	188.79	310141
2012	4	11	15	1.68	10.46	190.51	286448
2012	4	11	18	1.65	10.16	190.66	268384
2012	4	11	21	1.62	10.01	190.6	254894
2012	4	12	0	1.56	9.91	190.33	234001
2012	4	12	3	1.49	9.83	189.71	211749
2012	4	12	6	1.41	9.77	188.58	188464
2012	4	12	9	1.35	9.72	186.92	171882
2012	4	12	12	1.31	9.73	184.69	162013
2012	4	12	15	1.29	9.81	182.28	158396
2012	4	12	18	1.29	12.94	178.9	208934
2012	4	12	21	1.3	12.46	182.38	204315
2012	4	13	0	1.29	12.23	182.17	197470
2012	4	13	3	1.25	11.98	181.71	181624
2012	4	13	6	1.2	11.75	181.62	164171
2012	4	13	9	1.16	11.53	182.28	150536
2012	4	13	12	1.16	11.14	181.87	145444
2012	4	13	15	1.18	10.85	180.94	146585
2012	4	13	18	1.19	7.06	98.64	97005
2012	4	13	21	1.18	7.18	101.19	97002.7
2012	4	14	0	1.16	7.28	100.37	95048
2012	4	14	3	1.14	7.44	99.78	93816.3
2012	4	14	6	1.13	7.68	99.63	95151.1
2012	4	14	9	1.12	8.12	104.26	98829.7
2012	4	14	12	1.12	8.34	105.35	101507
2012	4	14	15	1.13	8.45	106.52	104691
2012	4	14	18	1.15	8.5	107.83	109071
2012	4	14	21	1.19	8.54	109.06	117340
2012	4	15	0	1.27	8.55	109.95	133804
2012	4	15	3	1.32	8.51	110.56	143871
2012	4	15	6	1.28	8.45	110.78	134330
2012	4	15	9	1.21	8.39	110.61	119187
2012	4	15	12	1.14	8.36	110.75	105417
2012	4	15	15	1.19	8.34	111.48	114592
2012	4	15	18	1.34	8.33	112.64	145128
2012	4	15	21	1.44	8.33	114.26	167597
2012	4	16	0	1.63	8.27	117.63	213195
2012	4	16	3	1.92	7.33	188.1	262181
2012	4	16	6	2.22	7.97	188.62	381118
2012	4	16	9	2.36	8.26	191.84	446375
2012	4	16	12	2.35	8.3	191.25	444743
2012	4	16	15	2.25	8.26	189.77	405733
2012	4	16	18	2.11	8.19	187.74	353789
2012	4	16	21	1.96	8.06	184.96	300430
2012	4	17	0	1.81	7.78	190.3	247305
2012	4	17	3	1.67	7.62	188.12	206198
2012	4	17	6	1.56	7.53	185.07	177803
2012	4	17	9	1.5	7.45	181.56	162643
2012	4	17	12	1.47	7.37	177.84	154525
2012	4	17	15	1.44	7.31	174.89	147075
2012	4	17	18	1.41	7.39	173.44	142554
2012	4	17	21	1.38	7.57	172.94	139878
2012	4	18	0	1.37	7.64	173.15	139133
2012	4	18	3	1.37	7.65	173.46	139315
2012	4	18	6	1.34	7.68	173.41	133803
2012	4	18	9	1.32	7.74	172.99	130853
2012	4	18	12	1.31	7.82	172.3	130210
2012	4	18	15	1.3	7.87	171.37	129050
2012	4	18	18	1.27	7.87	170.43	123162
2012	4	18	21	1.25	7.88	169.44	119465
2012	4	19	0	1.24	8.89	161.8	132630
2012	4	19	3	1.24	8.91	161.39	132928
2012	4	19	6	1.16	8.85	160.91	115546
2012	4	19	9	1.09	8.78	159.82	101215
2012	4	19	12	1.05	8.72	157.96	93280.5
2012	4	19	15	1.04	8.79	155.39	92246.8
2012	4	19	18	1.01	8.86	152.24	87694.4
2012	4	19	21	0.99	8.89	148.65	84541.1
2012	4	20	0	0.97	8.92	144.9	81433.6
2012	4	20	3	0.96	8.95	142.34	80031.5
2012	4	20	6	0.92	8.96	141.1	73583.3
2012	4	20	9	0.85	8.9	141.46	62391.2
2012	4	20	12	0.8	6.94	126	43095.8
2012	4	20	15	0.77	6.93	119.59	39866.7
2012	4	20	18	0.74	6.96	114.02	36980.1
2012	4	20	21	0.73	7.02	109.92	36297.6
2012	4	21	0	0.73	7.17	108.27	37073.2
2012	4	21	3	0.75	7.24	104.85	39514.5
2012	4	21	6	0.77	7.33	102.83	42167.8
2012	4	21	9	0.8	7.45	102.36	46262.8
2012	4	21	12	0.81	7.61	103.57	48445.1
2012	4	21	15	0.8	7.77	106.73	48249.9
2012	4	21	18	0.79	7.87	111.76	47656.8
2012	4	21	21	0.76	7.78	118.47	43601.6
2012	4	22	0	0.75	7.53	126.03	41097.3
2012	4	22	3	0.74	7.32	131.91	38892.9
2012	4	22	6	0.74	7.09	115.27	37670.8
2012	4	22	9	0.75	6.93	117.01	37822.6
2012	4	22	12	0.82	6.88	117.43	44886.1
2012	4	22	15	0.84	6.83	117.15	46760
2012	4	22	18	0.87	6.82	116.99	50086.2
2012	4	22	21	0.94	6.76	118.03	57955.9
2012	4	23	0	1.07	6.24	152.28	69318.3
2012	4	23	3	1.39	6.25	178.38	117167
2012	4	23	6	2.02	7.29	186.5	288620
2012	4	23	9	2.65	12.89	181.41	878295
2012	4	23	12	3.05	13.1	182.41	1.18241e+06
2012	4	23	15	3.2	13.07	182.95	1.29859e+06
2012	4	23	18	3.17	12.87	183.58	1.25485e+06
2012	4	23	21	3.02	12.66	187.73	1.12032e+06
2012	4	24	0	2.83	12.35	188.34	959700
2012	4	24	3	2.69	12.21	188.79	857266
2012	4	24	6	2.59	12.19	189.14	793412
2012	4	24	9	2.57	12.24	188.95	784410
2012	4	24	12	2.53	12.33	188.86	765772
2012	4	24	15	2.46	12.31	188.54	722809
2012	4	24	18	2.4	12.16	188.28	679597
2012	4	24	21	2.47	11.98	187.26	709163
2012	4	25	0	2.59	11.82	185.66	769330
2012	4	25	3	2.66	11.69	183.82	802552
2012	4	25	6	2.66	11.55	182.85	792941
2012	4	25	9	2.6	11.21	187.21	735272
2012	4	25	12	2.51	11.04	187.52	674857
2012	4	25	15	2.41	10.98	187.62	618774
2012	4	25	18	2.34	11.02	187.72	585476
2012	4	25	21	2.3	11.17	187.58	573330
2012	4	26	0	2.27	11.51	187.28	575470
2012	4	26	3	2.25	12.11	180.18	594846
2012	4	26	6	2.24	12.07	178.71	587623
2012	4	26	9	2.24	11.99	177.22	583728
2012	4	26	12	2.24	11.95	176.62	581781
2012	4	26	15	2.26	11.92	176.1	590730
2012	4	26	18	2.26	11.88	175.99	588747
2012	4	26	21	2.27	11.81	175.52	590469
2012	4	27	0	2.27	11.7	175.41	584969
2012	4	27	3	2.26	11.59	174.99	574375
2012	4	27	6	2.23	11.47	180.96	553438
2012	4	27	9	2.17	11.31	180.45	516747
2012	4	27	12	2.1	11.17	180.04	477955
2012	4	27	15	2.11	11.06	179.48	477766
2012	4	27	18	2.07	10.96	179.13	455666
2012	4	27	21	2.01	10.87	178.42	426106
2012	4	28	0	1.94	10.74	177.68	392196
2012	4	28	3	1.95	10.58	176.84	390347
2012	4	28	6	2	10.21	181.06	396261
2012	4	28	9	2.06	9.93	180.46	408864
2012	4	28	12	2.11	8.3	184.46	358541
2012	4	28	15	2.14	8.27	182.79	367476
2012	4	28	18	2.14	8.29	181.55	368364
2012	4	28	21	2.1	9.84	172.56	421046
2012	4	29	0	2.05	9.99	173.07	407351
2012	4	29	3	2.09	10.24	176.67	433998
2012	4	29	6	2.08	10.51	170.81	441189
2012	4	29	9	1.95	10.63	170.01	392191
2012	4	29	12	1.73	10.68	168.9	310141
2012	4	29	15	1.5	10.68	167.99	233157
2012	4	29	18	1.39	10.61	167.58	198903
2012	4	29	21	1.53	10.21	172.08	231902
2012	4	30	0	1.62	10	172.05	254639
2012	4	30	3	1.77	9.88	172.11	300330
2012	4	30	6	1.88	8.34	152.23	286007
2012	4	30	9	1.9	8.39	149.97	293876
2012	4	30	12	1.96	8.46	147.42	315339
2012	4	30	15	2.03	8.6	144.18	343864
2012	4	30	18	2.08	8.93	136.13	374864
2012	4	30	21	2.08	9.15	133.59	384099
2012	5	1	0	2.06	9.24	131.82	380454
2012	5	1	3	2.03	9.29	130.48	371453
2012	5	1	6	2.24	9.38	129.38	456662
2012	5	1	9	2.32	9.55	126.72	498741
2012	5	1	12	2.73	9.61	126.63	694935
2012	5	1	15	2.78	9.57	126.95	717624
2012	5	1	18	2.34	9.47	126.72	503127
2012	5	1	21	2.28	9.4	126.81	474125
2012	5	2	0	1.95	9.38	127.3	346073
2012	5	2	3	1.89	9.38	127.92	325104
2012	5	2	6	1.84	9.34	128.31	306816
2012	5	2	9	1.78	9.32	128.2	286518
2012	5	2	12	1.74	9.39	127.37	275842
2012	5	2	15	1.69	9.57	124.05	265205
2012	5	2	18	1.65	9.57	122.72	252799
2012	5	2	21	1.6	9.46	122.63	234978
2012	5	3	0	1.55	9.37	121.36	218423
2012	5	3	3	1.51	9.55	119.86	211277
2012	5	3	6	1.51	9.7	119.01	214596
2012	5	3	9	1.49	9.75	118.28	210026
2012	5	3	12	1.44	9.72	117.78	195563
2012	5	3	15	1.39	9.66	117.41	181093
2012	5	3	18	1.35	9.59	117.1	169583
2012	5	3	21	1.12	7.38	1.53	89823.1
2012	5	4	0	1.16	7.52	1.76	98181.4
2012	5	4	3	1.23	7.58	190.8	111269
2012	5	4	6	1.28	7.59	193.69	120658
2012	5	4	9	1.25	7.56	195.17	114614
2012	5	4	12	1.25	7.51	196.62	113856
2012	5	4	15	1.26	7.46	197.08	114915
2012	5	4	18	1.3	7.43	196.27	121835
2012	5	4	21	1.65	7.13	195.02	188345
2012	5	5	0	2.16	8.08	194.2	365775
2012	5	5	3	2.59	11.67	193.79	759567
2012	5	5	6	2.72	11.5	193.17	825527
2012	5	5	9	2.74	11.31	192.59	823871
2012	5	5	12	2.71	11.89	192.21	847259
2012	5	5	15	2.82	9.12	191.37	703702
2012	5	5	18	2.66	8.98	189.56	616503
2012	5	5	21	2.48	8.73	186.72	520970
2012	5	6	0	2.3	8.41	187.62	431665
2012	5	6	3	2.3	8.32	183.31	427046
2012	5	6	6	2.33	11.64	178.8	613141
2012	5	6	9	2.23	11.36	172.15	548130
2012	5	6	12	2.14	11.14	169.18	495004
2012	5	6	15	2.07	10.99	165.91	456913
2012	5	6	18	2.04	10.86	162.76	438516
2012	5	6	21	2.03	10.74	159.86	429430
2012	5	7	0	2.23	8.75	157.43	422195
2012	5	7	3	2.06	8.51	159.04	350396
2012	5	7	6	1.94	8.37	156.78	305650
2012	5	7	9	1.87	8.33	154.57	282634
2012	5	7	12	1.3	9.26	117.25	151842
2012	5	7	15	1.25	8.98	117.1	136142
2012	5	7	18	1.2	8.88	117.05	124071
[truncated: 929 more rows]
